*This draft manuscript is distributed solely for purposes of courtesy review, and comments received will be addressed and treated as appropriate to ensure there is no conflict of interest. Its content is deliberative and pre-decisional, so it must not be disclosed or released by reviewers. Because the manuscript has not yet been approved for publication by the U.S. Geological Survey (USGS), it does not represent any official USGS finding or policy.*

1 **Modeling effects of crop production, energy development and conservation-**  
2 **grassland loss on avian habitat**

3  
4 **Short title: Modeling grassland-bird habitat**

5  
6 **Jill A. Shaffer<sup>1,\*</sup>¶, Cali L. Roth<sup>2</sup>¶, David M. Mushet<sup>1</sup>¶**

7  
8 <sup>1</sup>United States Geological Survey, Northern Prairie Wildlife Research Center, Jamestown, North  
9 Dakota, United States of America

10 <sup>2</sup>United States Geological Survey, Dixon Field Station, Dixon, California, United States of  
11 America

12  
13 \*Corresponding author

14 Email: [jshaffer@usgs.gov](mailto:jshaffer@usgs.gov)

15 ¶These authors contributed equally to this work.

16

## 17 **Abstract**

18 Birds are essential components of most ecosystems and provide many services valued by society.  
19 However, many populations have undergone striking declines as habitats have been lost or  
20 degraded by human activities. Terrestrial grasslands are vital habitat for birds in the North  
21 American Prairie Pothole Region (PPR), but grassland conversion and fragmentation from  
22 agriculture and energy-production activities have destroyed or degraded millions of hectares.  
23 Conservation grasslands can provide alternate habitat. In the United States, the Conservation  
24 Reserve Program (CRP) is the largest program maintaining conservation grasslands on  
25 agricultural lands, but conservation grasslands in the PPR have declined by over 1 million ha  
26 since the program's zenith in 2007. We used an ecosystem-services model (InVEST)  
27 parameterized for the PPR to quantify grassland-bird habitat remaining in 2014 and to assess  
28 degradation status of this remaining habitat as influenced by crop and energy (i.e., oil, natural  
29 gas, and wind) production. We compared our resultant habitat-quality ratings to grassland-bird  
30 abundance data from the North American Breeding Bird Survey to confirm that ratings were  
31 related to grassland-bird abundance. Of the grassland-bird habitat remaining in 2014, about 18%  
32 was degraded by nearby crop production, whereas energy production degraded an additional  
33 16%. We further quantified changes in availability of grassland-bird habitat under various land-  
34 cover scenarios representing incremental losses (10%, 25%, 50%, 75%, and 100%) of CRP  
35 grasslands from 2014 levels. Our model identified 1 million ha (9%) of remaining grassland-  
36 bird habitat in the PPR that would be lost or degraded if all CRP conservation grasslands were  
37 returned to crop production. In addition to direct losses, an economic climate favoring energy  
38 and commodity production over conservation has resulted in substantial degradation of

39 remaining grassland-bird habitat across the PPR. Other grassland regions of the world face  
40 similar challenges in maintaining avian habitat.

41

42 **Keywords** grassland birds, renewable energy, wind, oil, gas, Conservation Reserve Program,  
43 CRP, grassland conservation, habitat modeling, InVEST, land-use change, prairie pothole region

44

45

## 46 **Introduction**

47 Birds perform a variety of supporting, provisioning, regulating, and cultural services valued by  
48 society as defined by the Millenium Ecosystem Assessment [1]. Thus, the preservation of avian  
49 biodiversity has numerous positive benefits to society. Birds are important culturally in arts and  
50 literature; recreationally to birdwatchers and hunters; and economically as pollinators, pest  
51 predators, seed dispersers, and nutrient cyclers [2]. However, for over two decades,  
52 ornithologists have been raising the alarm about the precipitous decline of grassland birds, driven  
53 primarily by loss and degradation of habitat by anthropogenic means [3, 4]. Despite  
54 acknowledgment of the issue, habitat continues to be lost and degraded [5–7], and avian  
55 populations continue to plummet [8].

56 The Prairie Pothole Region (PPR) of North America is home to 38 of the 41 species  
57 classified by Sauer et al. [8] as grassland birds. However, most of the grasslands that these  
58 species rely upon for habitat have been converted to alternate uses. Two primary causes of  
59 contemporary habitat loss are crop production and energy development that result in grassland  
60 conversion and fragmentation [6, 9, 10]. Neither of these forces, i.e., crop production or energy  
61 development, are waning. Lark et al. [6] estimated that total net cropland area increased

62 nationwide by 2.98 million acres from 2008 to 2012, with the greatest increases occurring in the  
63 PPR. The largest regional crude-oil-production growth through 2025 in the United States is  
64 expected to come from the Bakken formation in North Dakota, USA [11]. The International  
65 Energy Agency [12] forecasts that the largest growth in world power-generating capacity will be  
66 from renewable energies, with the United States expected to become the second-biggest market  
67 after China. Regionally, the states of North Dakota and South Dakota have abundant wind  
68 resources, routinely ranking in the top 20 wind-producing states [13, 14].

69 A primary cause of habitat degradation is the fragmentation of remaining expanses of  
70 grassland habitat. Habitat fragmentation refers to the reduction in area of some original habitat, a  
71 change in spatial configuration (that is, spatial arrangement), and an increasing distance between  
72 patches of what remains, through the subdivision of continuous habitat into smaller pieces [15,  
73 16]. Fragmentation causes a loss of habitat heterogeneity, and with it, a loss of biodiversity;  
74 fragmentation also lowers habitat quality because of edge effects, such as lower avian  
75 reproductive success near the edge than interior of remaining habitat [17]. The indirect effects on  
76 habitat quality can be much larger than the direct effects of grassland loss. For example,  
77 McDonald et al. [18] found that 5% of habitat impacts to grassland birds were due to direct land-  
78 clearing activities associated with natural gas and petroleum development, but 95% were the  
79 result of habitat fragmentation and species-avoidance behavior. For wind turbines, they found  
80 similar direct and indirect impacts, 3–5% direct and 95–97% indirect. Thus, any evaluation of  
81 grassland-bird habitats should include an assessment of the quality of remaining habitats.

82 To offset the loss and degradation of native habitats, and the services they provide, both  
83 governmental and nongovernmental organizations have made significant monetary investments  
84 to restore and protect grassland habitats in the PPR. Given the prominence of agriculture  
85 throughout the PPR, the most wide-reaching conservation efforts have been associated with

86 various programs of the U.S. Department of Agriculture (USDA). Within the USDA, the  
87 Conservation Reserve Program (CRP) has had the largest impact in terms of establishing  
88 perennial grasslands on areas previously used for crop production (S1 Table) [19]. These  
89 conservation grasslands provide numerous ecosystem services, including sequestration of  
90 greenhouse gases, retention and processing of nutrients and chemicals that might otherwise  
91 enter waterbodies, and prevention of sediment loss [20]. Habitat created by conservation  
92 grasslands is important in maintaining populations of wildlife, including grassland-bird species  
93 [21–24]. These conservation grasslands can also buffer other adjacent grasslands from the  
94 indirect effects of crop production and energy development activities. However, payments to  
95 farmers participating in the CRP and other conservation programs have often failed to keep pace  
96 with rising values of agricultural commodities and land-rental rates [25]. The disparity of profits  
97 between participation in a conservation program versus production of agricultural commodities  
98 or the rental of land for crop production has resulted in a recent exodus of farmers from  
99 conservation programs [6, 20, 26]. Since peak enrollment of 14.9 million ha in 2007, CRP  
100 grasslands have declined 25% nationally [20]. CRP grasslands in the four states comprising the  
101 PPR declined from more than 3.5 million ha in 2007 to just over 2.3 million ha in 2012, a 35%  
102 decline [27]. Additionally, new varieties of pesticide-tolerant and drought-resistant crops, as well  
103 as the rising popularity of corn (*Zea mays*) and soy (*Glycine max*) as biofuels, have facilitated the  
104 production of row crops in areas previously dominated by small-grain production and  
105 conservation grasslands [27].

106 In addition to the current loss of conservation grasslands to crop production, increasing  
107 demand for domestic energy sources will likely have a negative impact on grassland quantity and  
108 quality. McDonald et al. [18] estimated that 20.6 million ha of new land will be required to meet  
109 U.S. energy demands by 2030, with temperate grasslands projected to be one of the most highly

110 impacted terrestrial habitat types. The most intact grassland landscapes in the PPR are generally  
111 located on high-elevation geological features that are too rugged for mechanized agricultural  
112 equipment or too dry for row-crop agriculture, but even these grasslands are threatened due to  
113 their potential as sites for wind facilities, and for oil and gas development [9, 10].

114 In this study, we did not attempt to quantify the impact of historic habitat losses in the  
115 PPR on grassland birds. Instead, we focused on the contemporary impacts that crop production  
116 and energy development activities have on remaining habitats and the role of conservation  
117 grasslands in mitigating these impacts. Our specific research objectives were to: 1) quantify  
118 current (2014) grassland-bird habitat within the PPR using a modeling approach that incorporates  
119 indirect impacts to habitat integrity, 2) verify that resultant habitat-quality rankings are related to  
120 grassland-bird abundance, 3) quantify the contribution of oil, natural gas, and wind development  
121 to degradation of remaining grassland habitat, and 4) quantify the habitat degradation that would  
122 occur if various percentages of CRP conservation grasslands in the PPR were returned to crop  
123 production. Recognizing that crop production and energy development will likely continue to  
124 cause loss and degradation of remaining grasslands, and that CRP grasslands continue to decline  
125 across the PPR, we provide a baseline scenario against which future habitat projections can be  
126 compared.

## 127 **Material and methods**

### 128 **Study area**

129 The PPR covers approximately 82 million ha of the United States and Canada (Fig 1). Glacial  
130 processes shaped the region and created a landscape consisting of millions of palustrine wetlands  
131 (often termed prairie potholes) interspersed within a grassland matrix [28, 29]. The PPR is  
132 recognized as one of the largest grassland/wetland complexes in the world [30]. It is a globally

133 important ecosystem for a wide variety of flora and fauna including grassland and wetland plants  
134 [31], grassland birds [32], shorebirds [33], waterbirds [34], waterfowl [35], small mammals [36],  
135 amphibians [37], and aquatic and terrestrial invertebrates, including pollinators [29, 38, 39].  
136 Despite the biological value of the PPR, grassland loss continues unabated, and conservation  
137 efforts are not keeping pace with habitat destruction [5, 6, 39, 40].

138

139 Fig 1. Distribution of cropland (Map A) and suitable grassland-bird habitat with an InVEST habitat-  
140 quality ranking  $\geq 0.3$  (indicated in black) (Map B) in the Prairie Pothole Region of the United States in  
141 2014. Ecoregions are the Northern Glaciated Plains (NGP), Northwestern Glaciated Plains (NWGP),  
142 Lake Agassiz Plain (LAP), and Des Moines Lobe (DML) ecoregions [41].

143

144 In addition to supporting grassland- and wetland-dependent biota, the combination of the  
145 region's rich glacial soils and temperate climate has made it an ideal area for agricultural  
146 commodity production [42]. To facilitate crop production, approximately 95% of native tallgrass  
147 prairie and 60% of native mixed-grass prairie have been converted to croplands since European  
148 settlement (Fig 1) [43]. In an effort to increase our understanding of how this land-cover change  
149 has affected the integrity of avian habitat, we quantified suitable grassland-bird habitat across the  
150 three Level III ecoregions (Northern Glaciated Plains, Northwestern Glaciated Plains, and Lake  
151 Agassiz Plain) [41] and one level IV ecoregion (Des Moines Lobe) [41] that constitute the  
152 United States portion of the PPR (Fig 1).

153

## 154 **Modeling approach**

155 We used the Habitat Quality Module of the Integrated Valuation of Ecosystem Services and  
156 Tradeoffs (InVEST) modeling suite version 3.2.0 [44] to quantify grassland-bird habitat.

157 InVEST is a suite of spatially based modeling tools that quantify services derived from  
158 ecosystems, including the maintenance of wildlife habitats [45]. Using InVEST, we modeled  
159 grassland-bird habitat for the year 2014. We chose 2014 because it is the most current year for  
160 which we could obtain both energy-development and CRP data layers. We created land-cover  
161 data layers by combining the 2014 National Agricultural Statistics Service (NASS) cropland data  
162 layer and a shape file obtained from USDA Farm Service Agency's Economics and Policy  
163 Analysis Staff that identified areas enrolled in the CRP in 2014. A complete description of our  
164 development of the land-cover layers used in InVEST runs is provided online in S2 Table.

165 To develop a baseline habitat layer, we defined suitable grassland-bird habitat as any  
166 land-cover category of grassland (i.e., herbaceous grassland [e.g., native prairie], CRP grassland,  
167 hayland) and specific categories of small-grain cropland (S3 Table). Habitat suitability weights  
168 from 0–1 were assigned to each land-cover category relative to one another, with higher weights  
169 representing the most suitable habitat. For example, native prairie and CRP grassland were  
170 equally highly weighted (i.e., 1.0), small-grain cropland received a weight half that of grasslands  
171 (i.e., 0.5), fallow land received the lowest weight for habitats (i.e., 0.3), and non-habitat land-  
172 cover classes received a weight of 0. For our analysis, suitable grassland-bird habitat was  
173 defined as any pixel with a habitat rating  $\geq 0.3$ , i.e., the lowest weight assigned to a land-cover  
174 class identified as habitat. InVEST takes habitat models one step beyond relative habitat-  
175 suitability rankings by incorporating threats to habitat integrity, weighting those threats relative  
176 to one another, incorporating the linear distance that those threats influence adjacent habitats,  
177 and ranking the sensitivity of habitats to each threat. We identified threats to grassland-bird  
178 habitat as the primary causes of fragmentation and degradation of large tracts of grasslands: 1)  
179 woodland, 2) urbanization, 3) cropland, 4) roads, and 5) energy development [5, 46–54]. We  
180 weighted each threat from 0–1 by expected impact to grassland-bird habitat, with higher weights



181 representing greater habitat degradation (S4 Table). We determined the distance that threats  
182 acted upon nearby habitats based on published literature [9, 10, 47, 48, 50, 51, 55, 56].

183 We assigned the greatest threat value to woodland and urbanized areas because grassland  
184 birds find these land-cover types virtually unsuitable for all aspects of their life cycle and they  
185 harbor predators and nest parasites that affect quality of nearby habitats. Cropland can have  
186 value as habitat, e.g., grains and berries serve as food sources and vegetation serves as escape  
187 and shade cover, but disturbance associated with weed control, tillage and harvest usually  
188 precludes successful nesting, if nesting is even attempted. Roads, well pads and turbine pads  
189 accompanying energy development generally have a small relative footprint on a landscape  
190 level, and species show varying degrees of tolerance to these types of disturbances.

191 At a pixel level in the InVEST model, a pixel's original habitat-ranking value can  
192 decrease because of its proximity to a threat, causing one of two outcomes: a decrease in value  
193 such that the pixel no longer maintains a value  $\geq 0.3$ , i.e. a loss in suitability, or a decrease in  
194 value, but not below 0.3, i.e., a degradation quality but still suitable habitat. Loss can occur  
195 under two situations: 1) when a pixel becomes converted from a habitat land-use category to  
196 non-habitat category, as in the situation whereby native prairie gets converted to corn, or 2) when  
197 a pixel itself does not change land-use category, but a change in a nearby pixel triggers the threat  
198 distance to decrease the focal pixel's value below 0.3. We chose to examine the impact of two of  
199 our five threats, cropland and energy development, because cropland has the greatest footprint in  
200 the PPR (Fig 1A) and is the traditional and ongoing major cause of habitat loss for grassland  
201 birds, whereas energy development is a more recent, but still developing, threat, and its impact is  
202 more localized.

203 We created binary rasters of each threat's location across the PPR. We developed  
204 cropland and woodland threat layers through a reclassification process of land-cover layers using

205 R (version 3.2.0, packages *rgdal*, *raster*, *sp*, and *rgeos*) [57]. We developed urban and road threat  
206 layers using a combination of 2015 Tiger/Line city census data and NASS and developed the  
207 energy threat layer by downloading 2014 locations publicly available through the U.S.  
208 Geological Survey (S2 Table). We buffered turbine locations by 30 m [58] and gas and oil well  
209 locations by 100 m [9] to represent surface impact. When threat locations were applied to the  
210 landscape in the model, every threat's weight decayed linearly over the maximum distance of its  
211 impact, representing greater impact at closer proximity to the threat.

212 To verify that habitat-quality scores are positively associated to grassland-bird  
213 abundance, we related the habitat-quality scores output by the model to breeding-bird abundance  
214 using negative binomial regression due to the over-dispersed nature of the count data [59]. We  
215 based our bird-abundance estimates on ten avian species that represent mixed-grass prairie  
216 endemics: upland sandpiper (*Bartramia longicauda*), Sprague's pipit (*Anthus spragueii*),  
217 chestnut-collared longspur (*Calcarius ornatus*), clay-colored sparrow (*Spizella pallida*),  
218 savannah sparrow (*Passerculus sandwichensis*), vesper sparrow (*Pooecetes gramineus*),  
219 grasshopper sparrow (*Ammodramus savannarum*), Baird's sparrow (*Ammodramus bairdii*),  
220 bobolink (*Dolichonyx oryzivorus*), and western meadowlark (*Sturnella neglecta*). We acquired  
221 data for these species from the North American Breeding Bird Survey (BBS), a continental,  
222 road-side survey conducted annually since 1966 [8, 60]. We pooled the sum total of the counts  
223 of all ten species by BBS stop for North Dakota, the state for which spatial coordinates for stops  
224 were available [61]. We merged stop-level BBS bird counts by species with these locations. We  
225 buffered each survey stop by 400 m, the distance at which birds are assumed to be detected in the  
226 surveys. We calculated the mean habitat quality within this buffer from our InVEST output and  
227 compared these values to the grassland-bird abundance estimate for that point.

228 We next used InVEST to quantify current (2014) grassland-bird habitat quality and  
229 quantity, and grassland-bird habitat quality and quantity among our various scenarios of CRP  
230 loss for the PPR within the United States. For our CRP grassland loss scenarios, we created  
231 polygon sets containing 100%, 75%, 50%, 25%, 10% and 0% of the CRP fields in our 2014  
232 baseline land-cover layer using a random, successive subsetting method so that CRP fields  
233 included in lower percentage sets were also included in the higher percentage sets. Using each  
234 set of polygons as a mask, these fields were converted to crop in our baseline land-use layer to  
235 simulate the conversion of CRP grassland habitat to agriculture. By removing percentages of  
236 fields rather than total area in our baseline data layer, we followed the assumption that if a farmer  
237 decided to remove land from a conservation program, this decision would be made on a field-by-  
238 field basis rather than on an unrealistic pixel-by-pixel basis. We compared land-cover layers for  
239 each percentage-loss scenario to total CRP grassland area in the 0% loss layer to verify that the  
240 correct percentage of CRP grassland was converted to cropland. We used an output cell size of  
241 40 m and a half-saturation constant of 0.20. In each run (i.e., scenario), the model worked to  
242 erode the quality value of identified grassland-bird habitats (initial value  $\geq 0.3$ ) based on spatial  
243 proximity to a threat, susceptibility to that threat, and the threat's strength (i.e., threat weight).  
244 Output data layers from the model were used to create maps depicting changes in grassland-bird  
245 habitat quality among scenarios of CRP loss. From our habitat quality maps, we produced  
246 summary tables quantifying changes in suitable-habitat quantity (ha) by ecoregions.

247

## 248 **Results**

249 Using BBS data, we verified that resultant InVEST habitat-quality ratings were positively related  
250 to abundance of grassland birds in North Dakota (slope = 1.207, SE = 0.0661,  $z = 18.25$ ,  $p <$

251 0.001). The correlation between abundance estimates from BBS surveys and our modeled bird-  
252 abundance was significantly different from zero ( $t = 60.7449$ ,  $df = 2087$ ,  $p < 0.001$ ). While we  
253 the correlation between observed and predicted values was 0.80, the pseudo R-squared was only  
254 0.017, indicating a poor model fit indicating that factors, in addition to habitat quality, influenced  
255 actual bird occurrence. Also of note, only two BBS survey points with habitat-quality rankings  
256 less than 0.30 had a BBS bird count greater than 100. Likewise, only a single survey point with a  
257 habitat quality less than 0.50 had a bird BBS bird count greater than 200. Of the BBS survey  
258 points with a habitat-quality ranking greater than 0.50 ( $N = 1006$ ), 152 had counts of greater than  
259 100 birds while 22 had bird counts greater than 200. Thus, while points with high habitat-quality  
260 ratings were associated with both low and high bird abundance, points with low quality ratings  
261 were almost always associated with low bird abundance (Fig 2).

262  
263  
264  
265  
266  
267  
268  
269  
270  
271  
272  
Fig 2. Scatter plot of modeled habitat-quality ratings versus actual bird counts for 2089 points surveyed during the 2014 Breeding Bird Survey.

263  
264 From our baseline (2014) model and our definition of suitable habitat as any land-cover  
265 type with a habitat-quality ranking higher than 0.3, we estimated that around 12 million ha of  
266 suitable grassland-bird habitat (i.e., habitat quality score  $\geq 0.3$ ) remained within the four PPR  
267 ecoregions in 2014 (Table 1; Fig 1B). The Northern Great Plains and Northwest Glaciated  
268 Plains ecoregions accounted for over 80% of the suitable grassland-bird habitat. Availability of  
269 suitable grassland-bird habitat was lowest in the Des Moines Lobe ecoregion. Area of cropland  
270 (8.9 million ha) greatly exceeded area devoted to energy development (44.5 thousand ha, Table  
271 1).

272

273 Table 1. Area (ha) of suitable (i.e., a relative habitat-quality ranking  $\geq 0.3$  out of a maximum value of  
274 1.0) grassland-bird habitat and of non-suitable habitat that was devoted to cropland and energy  
275 development in 2014 within the Northern Glaciated Plains (NGP), Northwestern Glaciated Plains  
276 (NWGP), Lake Agassiz Plain (LAP), and Des Moines Lobe (DML) ecoregions of the United States.  
277 Areas were quantified using the National Agricultural Statistics Service Cropland Data Layer.

| Ecoregion    | Grassland-bird<br>Habitat | Non-habitat<br>Cropland | Energy Development<br>Land |
|--------------|---------------------------|-------------------------|----------------------------|
| NGP          | 5,306,372                 | 3,571,532               | 22,502                     |
| NWGP         | 4,783,726                 | 980,650                 | 21,290                     |
| LAP          | 1,245,027                 | 1,350,374               | 3                          |
| DML          | 590,612                   | 3,015,641               | 799                        |
| <b>Total</b> | <b>11,925,737</b>         | <b>8,918,197</b>        | <b>44,595</b>              |

278  
279 Our application of the InVEST model to quantify effects of cropland and energy  
280 development demonstrated low impact (21,000 ha) in causing original habitat-quality rankings to  
281 become unsuitable, i.e., falling below 0.3 due to the influence of nearby cropland or energy  
282 development threats (Table 2). However, cropland and energy development had a much greater  
283 impact in terms of degrading the quality of habitat when habitats that did not drop below a score  
284 of 0.3 are included. In this case, cropland degraded 18% (2.1 million ha) of the available grass-  
285 land bird habitat, while energy development degraded 16% (1.5 million ha, Table 2). Among  
286 ecoregions, remaining grassland-bird habitats in the Northern Great Plains and the Northwestern

287 Glaciated Plains were degraded the most and the Des Moines Lobe the least by cropland and  
288 energy development. Although not nearly as ubiquitous in distribution as cropland, where energy  
289 development occurs, its localized impact can be significant (S5 Fig). Land within the PPR is  
290 surveyed according to the Public Land Survey System of dividing land into parcels, one division  
291 of which is a township comprised of thirty-six 1-mi<sup>2</sup> (259 ha) sections [62]. We found entire  
292 townships were rendered unsuitable habitat by the clustering of oil wells in close proximity (S5  
293 Fig). Our scenario quantifying the impact of cropland on the suitability of current (2014) CRP  
294 conservation grassland as grassland-bird habitat showed suitable habitat loss of less than 1%,  
295 although it caused degradation of 12% of the grassland-bird habitat (Table 2). The largest  
296 decline in habitat quality occurred in the Northern Great Plains and the least in the Des Moines  
297 Lobe.

298

Table 2 Model results of the area (ha) of suitable grassland-bird habitat lost and degraded in four ecoregions of the United States under three threat scenarios: 1) influence of cropland, 2) influence of energy development, and 3) impact on Conservation Reserve Program (CRP) habitat value based on cropland threat. Baseline suitable habitat was quantified using the National Agricultural Statistics Service (NASS) Cropland Data Layer for 2014. Lost habitat indicates suitable habitat that fell below the relative habitat-quality rating of 0.3 on a maximum-scale value of 1.0. Degraded habitat indicates suitable habitat that dropped in habitat-quality ranking but stayed above 0.3 (i.e., was not lost). Values in parentheses represent the percentage of current (2014) suitable habitat degraded under the different scenarios. The ecoregions are the Northern Glaciated Plains (NGP), Northwestern Glaciated Plains (NWGP), Lake Agassiz Plain (LAP), and Des Moines Lobe (DML).

---

NASS  
2014

Application of the Habitat Quality Module of InVEST

Scenario 1: Cropland Threat

Scenario 2: Energy Threat

Scenario 3: Threat to CRP value

---

| by Cropland  |                                 |                                                              |                                              |                                  |                                                            |                                     |                                  |                                                                |                                                              |                                  |
|--------------|---------------------------------|--------------------------------------------------------------|----------------------------------------------|----------------------------------|------------------------------------------------------------|-------------------------------------|----------------------------------|----------------------------------------------------------------|--------------------------------------------------------------|----------------------------------|
|              | Suitable Grassland Bird Habitat | Habitat that became unsuitable (lost) due to cropland threat | Suitable habitat degraded by cropland threat | Grassland bird habitat remaining | Habitat that became unsuitable (lost) due to energy threat | Suitable habitat degraded by energy | Grassland bird habitat remaining | Habitat that became unsuitable (lost) due to loss in CRP value | Suitable habitat degraded by impact of cropland on CRP value | Grassland Bird Habitat Remaining |
| NGP          | 5,306,372                       | 1,784                                                        | 1,131,551 (-21%)                             | <b>5,304,588</b>                 | 6,686                                                      | 1,011,304 (-19%)                    | <b>5,299,686</b>                 | 265                                                            | 835,229 (-16%)                                               | <b>5,306,107</b>                 |
| NWGP         | 4,783,726                       | 617                                                          | 605,376 (-13%)                               | <b>4,783,109</b>                 | 8,593                                                      | 732,798 (-15%)                      | <b>4,775,133</b>                 | 84                                                             | 505,944 (-11%)                                               | <b>4,783,642</b>                 |
| LAP          | 1,245,027                       | 936                                                          | 228,064 (-18%)                               | <b>1,244,091</b>                 | 3                                                          | 125,821 (-10%)                      | <b>1,245,024</b>                 | 76                                                             | 137,199 (-11%)                                               | <b>1,244,951</b>                 |
| DML          | 590,612                         | 2,644                                                        | 183,393 (-31%)                               | <b>587,968</b>                   | 0.8                                                        | 20,800 (-4%)                        | <b>590,611</b>                   | 526                                                            | 24,994 (-4%)                                                 | <b>590,086</b>                   |
| <b>Total</b> | <b>11,925,737</b>               | <b>5,981</b>                                                 | <b>2,148,384 (-18%)</b>                      | <b>11,919,756</b>                | <b>15,283</b>                                              | <b>1,890,723 (-16%)</b>             | <b>11,910,454</b>                | <b>951</b>                                                     | <b>1,503,366 (-13%)</b>                                      | <b>11,924,786</b>                |

299

300

301

302

303

304

305

306

Our scenario-based CRP modeling revealed a loss in suitable grassland-bird habitat (-2% across the PPR) if 25% of CRP grasslands present in 2014 are returned to agricultural production. This loss of suitable habitat increases to 9% (a loss of approximately 1 million ha) if all CRP grasslands within the PPR are returned to agricultural production (Table 3; Fig 3A-B). Our modeling also reveals that the Des Moines Lobe would have the greatest relative loss of suitable grassland-bird habitat (-28% in our scenario in which all CRP grasslands are converted to cropland) and the Northwest Glaciated Plain the least (Table 3; Fig 3A-B).

Table 3 Area (ha) of suitable grassland-bird habitat with a relative habitat-quality ranking  $\geq 0.3$  on a maximum-scale value of 1.0 in the Northern Glaciated Plains (NGP), Northwestern Glaciated Plains (NWGP), Lake Agassiz Plain (LAP), and Des Moines Lobe (DML) ecoregions of the United States in the baseline year of 2014 and under five scenarios reflecting the conversion of 10%, 25%, 50%, 75%, and 100% of Conservation Reserve Program (CRP) grasslands to croplands. Values in parentheses represent the percentage of current (2014) suitable habitat lost under the different scenarios of CRP conversion.

|              | Scenarios         |                           |                           |                           |                           |                         |
|--------------|-------------------|---------------------------|---------------------------|---------------------------|---------------------------|-------------------------|
|              | Current (2014)    | -10% CRP                  | -25% CRP                  | -50% CRP                  | -75% CRP                  | -100% CRP               |
| NGP          | 5,306,107         | 5,251,384 (-1%)           | 5,167,975 (-2.6%)         | 5,032,669 (-5.2%)         | 4,899,528 (-7.7%)         | 4,763,082 (-10.2%)      |
| NWGP         | 4,783,642         | 4,768,035 (-0.3%)         | 4,745,516 (-0.8%)         | 4,707,775 (-1.6%)         | 4,667,930 (-2.4%)         | 4,629,745 (-3.2%)       |
| LAP          | 1,244,951         | 1,224,431 (-1.7%)         | 1,193,985 (-4.1%)         | 1,142,761 (-8.2%)         | 1,090,123 (-12.4%)        | 1,039,903 (-16.5%)      |
| DML          | 590,086           | 573,486 (-2.8%)           | 547,934 (-7.1%)           | 506,192 (-14.2%)          | 465,286 (-21.2%)          | 424,647 (-28%)          |
| <b>Total</b> | <b>11,924,786</b> | <b>11,817,336 (-0.9%)</b> | <b>11,655,410 (-2.3%)</b> | <b>11,389,397 (-4.5%)</b> | <b>11,122,867 (-6.7%)</b> | <b>10,857,377 (-9%)</b> |

Fig 3. Distribution of suitable habitat with an InVEST habitat-quality ranking  $\geq 0.3$  under a scenario in which all Conservation Reserve Program (CRP) grasslands present in the Prairie Pothole Region of the United States in 2014 are intact (Map A) and a scenario in which all CRP grasslands are converted to crop production (Map B).

307

## 308 Discussion

309 We demonstrated both the utility of applying the InVEST-modeling approach to  
 310 quantifying habitat suitability for grassland birds and estimating the effects of land-cover  
 311 conversion scenarios on these habitats. An important distinction between InVEST and other



312 approaches is that InVEST allows for not only the modeling of land-cover conversion scenarios,  
313 but also the quantification of how habitat “threats” impact landscape-level habitat availability to  
314 an organism. This allows for more robust quantifications of how matrices of land cover, some of  
315 which are suitable habitat for birds and some of which are habitat threats, interact to affect  
316 overall landscape integrity, in our case for grassland birds. We did not attempt to forecast  
317 grassland-bird population sizes, but rather quantified habitat quality as influenced by threats and  
318 susceptibility to those threats. Multiple factors in addition to summertime nesting habitat affect  
319 grassland-bird populations, some (e.g., condition of wintering habitat) are far removed from our  
320 study region. Thus, prediction of population sizes was beyond the scope of our work. However,  
321 habitat-quality information derived from the methodology described here could likely play an  
322 important role in the development and improvement of grassland-bird population models.

323 We chose to quantify the degree to which one traditional and widespread threat, cropland,  
324 and one nascent but more localized threat, energy development, influenced the availability of  
325 suitable grassland-bird habitat in the current (2014) matrix of land cover in the PPR. It is key to  
326 note that, with the exception of our CRP-conversion scenarios, we did not quantify the direct loss  
327 of habitat resulting from conversion of grasslands to cropland or due to energy development.  
328 Rather, we quantified the effects of habitat threats within the current (2014) landscape  
329 configuration on the remaining area of suitable grassland-bird habitat within that landscape.  
330 Because of cropland’s pervasiveness throughout the PPR, its cumulative impact as a threat to  
331 remaining grassland-bird habitat is great, degrading remaining grassland-bird habitat at rates  
332 varying from 13–31% across the region (Table 2). Energy development, as a much more  
333 localized threat, had a smaller impact at 4–19% degradation rates across the region. However, in  
334 places where energy development has occurred, the localized impact has affected entire blocks of  
335 36 mi<sup>2</sup> (93.2 km<sup>2</sup>) townships (S5 Fig). By examining these threats at the ecoregion level, we were

336 able to determine those ecoregions in which grassland-bird habitats have been the most  
337 impacted.

338 Cropland and energy development threats caused <1% of remaining grassland-bird  
339 habitat fall from “suitable” to “unsuitable” as habitat. This may be explained in terms of where  
340 cropland and energy development occur, which is in rural areas where, when a land-cover  
341 change occurs (i.e., a crop/non-crop interface), that other edge is most likely to be grassland,  
342 which will have a fairly high relative suitability ranking. The impact to watch, therefore, is the  
343 degree to which remaining suitable habitat is degraded due to its proximity to cropland and  
344 energy development. It is in this category that we see the influence of cropland and energy take a  
345 marked toll on the integrity of grassland-bird habitat. It is also important to note that not all  
346 cropland areas are unsuitable as grassland-bird habitat. Grassland-like crops and small-grains,  
347 such as alfalfa and wheat, have some value as avian habitat, whereas row crops such as corn and  
348 soybeans do not (S3 Table). Therefore, we would expect highest degradation in highly  
349 fragmented areas, e.g., where grassland and cropland edges regularly abut, and where those  
350 cropland edges are row crops. The highest degradation, 31%, occurred in the Des Moines Lobe,  
351 which includes the corn and soy fields of Iowa. A final point is that the low amount of habitat  
352 that fell below 0.3 indicates that the greatest threat to grassland integrity is not degradation, but  
353 the more direct effects of conversion to row crops, in which pixels that rank as high as 1  
354 immediately fall below 0.3 upon conversion.

355 As to energy development, the largest congregation of oil and gas wells in the PPR is in  
356 the Bakken Region of northwestern North Dakota, and it is in the Northern Great Plains that  
357 energy has caused the greatest degradation in remaining grassland-bird-habitat quality. The  
358 threat of cropland to CRP habitat quality is fairly uniform across all ecoregions except the Des  
359 Moines Lobe, which has minimal degradation, which would occur if very little CRP occurred in

360 that ecoregion. In ecoregions in which CRP is a large component of the grassland landscape, its  
361 adjacency to cropland threatens its integrity. In these areas, maintaining primarily grassland  
362 landscapes, either of CRP or native prairie, will be important for the maintenance of grassland-  
363 bird-habitat quality.

364 Our application of InVEST's Habitat Quality Module to the CRP-conversion scenario  
365 revealed that if all-remaining CRP lands are returned to crop production, losses of suitable  
366 grassland-bird habitat would equal approximately 9% of the total suitable habitat available across  
367 the PPR in 2014. The CRP is a long-acknowledged driver in the maintenance and stabilization of  
368 grassland-bird populations [63–65]. The effects on grassland birds of losing close to one-tenth of  
369 their remaining suitable habitat in the PPR would undoubtedly be significant, and each ecoregion  
370 would face unique circumstances. The Des Moines Lobe and Lake Agassiz Plain ecoregions  
371 have already lost most of their natural grassland habitat due to intensive agricultural  
372 development. The Des Moines Lobe, which would lose over a quarter of its remaining suitable  
373 grassland-bird habitat, and the Agassiz Lake Plain, which would lose 16%, can each barely  
374 afford to lose additional habitat. Even with CRP intact, several grassland-bird species in these  
375 regions are in decline and species of federal conservation concern [66]. The loss of CRP could  
376 plausibly facilitate the extirpation of several grassland-bird species and render those regions to  
377 become species depauperate.

378 The Northern and Northwestern Glaciated Plains each have significantly more remaining  
379 grassland-bird habitat than the other two ecoregions. However, our model results demonstrate  
380 that loss of CRP would affect them at different levels; amount of suitable habitat in the Northern  
381 Glaciated Plains (10.2% loss of grassland-bird habitat under 100% CRP loss scenario) was more  
382 dependent on CRP lands than in the Northwestern Glaciated Plains (3.2% loss under the same  
383 CRP loss scenario). Most of the Northwestern Glaciated Plains is made up of an area known as

384 the Missouri Coteau. The topography of the Missouri Coteau is varied, with greater local relief  
385 and rockier, less fertile, soils than in the Northern Glaciated Plains to the east. As a result,  
386 croplands, while still the major land cover-type, are less abundant, and native grassland pastures  
387 and rangelands form a larger component of the Northwestern Glaciated Plains landscape than  
388 conservation grasslands. While CRP grasslands still provides significant habitat in the  
389 Northwestern Glaciated Plains, other areas of grassland habitats also contribute towards the  
390 maintenance of the region's avian biodiversity. Even so, loss of CRP grasslands in the  
391 Northwestern Glaciated Plains are compounded by the impact of oil and gas development  
392 prevalent in this region and lokely have a negative impact on species of conservation concern,  
393 such as the Sprague's Pipit, Baird's Sparrow, and McCown's Longspur (*Rhyncophanes*  
394 *mccownii*) [66].

395 The results of our modeling efforts identify recent past and potential future bird habitat  
396 losses in the PPR of the United States. However, they also identify opportunities for the  
397 improvement of habitats if current trends can be reversed, either through gains in CRP or through  
398 other conservation programs that lead to increases in grassland habitats on the PPR landscape  
399 (e.g., USDA Natural Resources Conservation Service's Agricultural Conservation Easement  
400 Program). The potential of conservation grasslands to mitigate grassland-bird habitat loss in the  
401 PPR has been demonstrated by the amount of suitable habitat that has been created on the  
402 landscape through a single conservation program, the CRP. If the CRP was not as successful as it  
403 has been in providing avian habitat on the PPR landscape, we would not see losses of these lands  
404 from the landscape resulting in such significant declines in suitable grassland-bird habitat in our  
405 modeled scenarios, and our validation work demonstrated that declines in habitat quality ratings  
406 are directly related to declines in overall grassland-bird populations. Thus, the CRP and other  
407 conservation programs can play a significant role in restoring grassland-bird populations in the

408 PPR. However, care must be taken to recognize the transitory nature of conservation lands that  
409 are not protected through fee-title ownership or through long-term easements. As seen through  
410 recent losses of CRP conservation grasslands across the PPR landscape, lands protected through  
411 short-term contracts will likely revert to other uses during periods when conservation payments  
412 lag behind profits that can be realized through conversion back to crop production.

413 An economic climate driven by demands for commodities has resulted in marked losses  
414 of grassland-bird habitat not just in the PPR, but worldwide. The resulting impact on species  
415 dependent upon habitat provided by natural and conservation lands could be substantial as these  
416 lands are converted to commodity production. However, conversely, providing perennial  
417 grassland cover on agricultural lands through conservation programs has great potential to  
418 reverse these trends. Our results are applicable beyond the PPR in areas where grass-land bird  
419 habitats consist of grasslands embedded in a cropland matrix and economic pressures favor the  
420 conversion of natural and/or conservation grasslands to crop production and energy  
421 development. By use of scenarios-based models such as InVEST to quantify grassland-bird  
422 habitats, insights that help us identify potential effects land-cover change can be obtained. This  
423 increased knowledge will be needed to facilitate the improvement and ultimate success of  
424 grassland-bird conservation efforts.

425

## 426 **Acknowledgments**

427

428 Financial support for this effort came from the USDA's Natural Resources Conservation  
429 Service through their Conservation Effects Assessment Project (CEAP—Wetlands) and the Farm  
430 Service Agency's Economics and Policy Analysis Staff. Deb Buhl provided advice in statistical

431 modeling, Neal Niemuth in modeling BBS data, Lawrence Igl in grassland-bird threats, Clint  
432 Otto and Max Post van der Burg in theoretical considerations, and Skip Hyberg in CRP  
433 information. Eric Lonsdorf provided a critical review of an earlier draft of this manuscript. Any  
434 use of trade, firm, or product names is for descriptive purposes only and does not imply  
435 endorsement by the U.S. Government. All data used in support of this manuscript are publicly  
436 available through USGS at [https:// https://doi.org/10.5066/F72J69RM](https://doi.org/10.5066/F72J69RM).

437

438

## 439 **References**

- 440 1. Millenium Ecosystem Assessment. 2003. Ecosystems and human well-being: a  
441 framework for assessment. Washington: Millenium Ecosystem Assessment; 2003.
- 442 2. Sekercioglu CH, Wenny DG, Whelan CJ. Why birds matter: avian ecological function  
443 and ecosystem services. Chicago: University of Chicago Press; 2016.
- 444 3. Askins RA. Population trends in grassland, shrubland, and forest birds in eastern North  
445 America. *Current Ornithol.* 1993;11: 1-34.
- 446 4. Knopf FL. Avian assemblages on altered grasslands. In: Jehl JR Jr, Johnson NK, editors.  
447 A century of avifaunal change in western North America: studies in avian biology. Los  
448 Angeles: Cooper Ornithological Society; 1994. pp. 247-257.
- 449 5. Doherty KE, Ryba AJ, Stemler CL, Niemuth ND, Meeks WA. Conservation planning in  
450 an era of change: state of the U.S. Prairie Pothole Region. *Wildl. Soc. Bull.* 2013;37:  
451 546–563.

- 452 6. Lark TJ, Salmon JM, Gibbs HK. Cropland expansion outpaces agricultural and biofuel  
453 policies in the United States. *Environ. Research Lett.* 2015;10: 055004.  
454 doi:10.1088/1748-9326/10/4/044003.
- 455 7. Gage AM, Olimb SK, Nelson, J. Plowprint: tracking cumulative cropland expansion to  
456 target grassland conservation. *Great Plains Research.* 2016;26: 107-116.
- 457 8. Sauer JR, Link WA, Fallon JE, Pardieck KL, Ziolkowski DJ Jr. The North American  
458 breeding bird survey 1966–2011: summary analysis and species accounts. *North Am.*  
459 *Fauna* 2013;79: 1–32.
- 460 9. Thompson SJ, Johnson DH, Niemuth ND, Ribic CA. Avoidance of unconventional oil  
461 wells and roads exacerbates habitat loss for grassland birds in the North American Great  
462 Plains. *Biol. Conserv.* 2015;192: 82-90.
- 463 10. Shaffer JA, Buhl DA. Effects of wind-energy facilities on breeding grassland bird  
464 distribution. *Conserv. Biol.* 2016;30: 59-71.
- 465 11. United States Energy Information Administration (USEIA). U.S. crude oil production to  
466 2025: updated projection of crude types. Washington: U.S. Department of Energy; 2015.  
467 Available from: <https://www.eia.gov/analysis/petroleum/crudetypes>. Cited 9 April 2018.
- 468 12. International Energy Agency. World Energy Outlook 2016. Paris: OECD/IEA; 2016.  
469 Available from: [http://www.iea.org/newsroom/news/2016/november/world-energy-](http://www.iea.org/newsroom/news/2016/november/world-energy-outlook-2016.html)  
470 [outlook-2016.html](http://www.iea.org/newsroom/news/2016/november/world-energy-outlook-2016.html). Cited 9 April 2018.
- 471 13. Fargione J, Kiesecker J, Slaats MJ, Olimb S. Wind and wildlife in the Northern Great  
472 Plains: identifying low-impact areas for wind development. *PLoS One* 2012;7: e41468.  
473 doi:10.1371/journal.pone.0041468.
- 474 14. United States Department of Energy (USDOE). 2015 wind technologies market report.  
475 DOE/GO-10216-4885. Energy efficiency and renewable energy. Washington: U.S.

- 476 Department of Energy; 2016. Available from:  
477 [https://energy.gov/sites/prod/files/2016/08/f33/2015-Wind-Technologies-Market-Report-](https://energy.gov/sites/prod/files/2016/08/f33/2015-Wind-Technologies-Market-Report-08162016.pdf)  
478 [08162016.pdf](https://energy.gov/sites/prod/files/2016/08/f33/2015-Wind-Technologies-Market-Report-08162016.pdf). Cited 9 April 2018.
- 479 15. Villard, M.A. Habitat fragmentation: major conservation issue or intellectual attractor?  
480 *Ecol. Applic.* 2002;12: 319–320.
- 481 16. Andr n H. Effects of habitat fragmentation on birds and mammals in landscapes with  
482 different proportions of suitable habitat: a review. *Oikos* 2004;71: 355–366.
- 483 17. Ribic CA, Koford RR., Herkert JR, Johnson DH, Niemuth ND, Naugle DE, Bakker, KK,  
484 Sample DW, and Renfrew RB. Area sensitivity in North American grassland birds:  
485 patterns and processes. *Auk* 2009;126: 233–244.
- 486 18. McDonald RI, Fargione J, Kiesecker J, Miller WM, Powell J. Energy sprawl or energy  
487 efficiency: climate policy impacts on natural habitat for the United States of America.  
488 *PLoS ONE*. 2009;4: e6802. doi:10.1371/journal.pone.0006802.
- 489 19. United States Department of Agriculture (USDA). CRP contract summary and statistics:  
490 annual summary. 2016. Available from:  
491 <http://www.fsa.usda.gov/FSA/webapp?area=home&subject=copr&topic=crp-st>. Cited 9  
492 April June 2018.
- 493 20. Morefield PE, LeDuc SD, Clark CM, Iovanna R. Grasslands, wetlands, and agriculture:  
494 the fate of land expiring from the Conservation Reserve Program in the Midwestern  
495 United States. *Environ. Research Lett.* 2016;11: 094005. doi:10.1088/1748-  
496 9326/11/9/094005
- 497 21. Riffell S, Scognamillo D, Burger LW. Effects of the conservation reserve program on  
498 northern bobwhite and grassland birds. *Env. Monitor. Assess.* 2008;146: 309-323.



- 499 22. Herkert JR. Response of bird populations to farmland set-aside programs. *Conserv. Biol.*  
500 2009;23: 1036-1040.
- 501 23. Allen AW, Vandever MW. Conservation Reserve Program (CRP) contributions to  
502 wildlife habitat, management issues, challenges and policy choices—an annotated  
503 bibliography. Scientific Investigations Report 2012-5066: U.S. Geological Survey; 2012
- 504 24. Uden DR, Allen CR, Mitchell R., McCoy TD, Guan Q. Predicted avian responses to  
505 bioenergy development scenarios in an intensive agricultural landscape. *GCB Bioenergy*  
506 2015;7: 717-726.
- 507 25. Rashford BS, Walker JA, Bastian CT. Economics of grassland conversion to cropland in  
508 the Prairie Pothole Region. *Conserv. Biol.* 2011;25: 276-284.
- 509 26. Wright CK, Wimberly MC. Recent land use change in the Western Corn Belt threatens  
510 grasslands and wetlands. *Proc. National Acad. Sci.* 2013;110: 4134-4139.
- 511 27. Mushet DM, Neau JL, Euliss NH Jr. Modeling effects of conservation grassland losses on  
512 amphibian habitat. *Biol. Conserv.* 2014;174: 93-100.
- 513 28. Kantrud HA, Krapu GL, Swanson GA. Prairie basin wetlands of the Dakotas: A  
514 community profile. Biological Report 85(7.28): US Fish and Wildlife Service; 1989.
- 515 29. Euliss NH Jr, Wrubleski DA, Mushet DM. Wetlands of the prairie pothole region:  
516 invertebrate species composition, ecology, and management. In: Batzer DP, Rader RB,  
517 Wissinger SA, editors. *Invertebrates in Freshwater Wetlands of North America: Ecology*  
518 *and Management*. New York: John Wiley and Sons; 1999. pp. 471-514.
- 519 30. van der Valk AG. The prairie potholes of North America. In: Fraser LH, Keddy PA,  
520 editors. *The world's largest wetlands: ecology and conservation*. Cambridge: Cambridge  
521 University Press; 2005. pp 393-423.

- 522 31. Northern Great Plains Floristic Quality Assessment Panel (NGPFQAP). Coefficients of  
523 conservatism for the vascular flora of the Dakotas and the adjacent grasslands. Inform.  
524 Tech. Rep. USGS/BRD/ITR-2001-0001: U.S. Geological Survey; 2001.
- 525 32. Rosenberg KV, Kennedy JA, Dettmers R, Ford RP, Reynolds D, Alexander JD,  
526 Beardmore CJ, Blancher PJ, Bogart RE, Butcher GS, Camfield AF, Couturier A,  
527 Demarest DW, Easton WE, Giacomo JJ, Keller RH, Mini AE, Panjabi AO, Pashley DN,  
528 Rich TD, Ruth JM, Stabins H, Stanton J, Will T. Partners in Flight landbird conservation  
529 plan: 2016 revision for Canada and continental United States. Partners in Flight Science  
530 Committee; 2016. Available from: <http://www.partnersinflight.org>. Cited 9 April 2018.
- 531 33. Brown S, Hickey C, Harrington B, Gill R. The U.S. Shorebird Conservation Plan.  
532 Manomet: Center for Conservation Sciences; 2001. Available from:  
533 <http://www.shorebirdplan.org>. Cited 9 April 2018.
- 534 34. Beyersbergen GW, Niemuth ND, Norton MR. Northern Prairie & Parkland Waterbird  
535 Conservation Plan. Denver: Prairie Pothole Joint Venture; 2004. Available from:  
536 [https://www.fws.gov/mountain-](https://www.fws.gov/mountain-prairie/refuges/hapetResources/updatedFiles/publications/Beyersbergen.et.al.2004.waterbird.plan.PPJV.pdf)  
537 [prairie/refuges/hapetResources/updatedFiles/publications/Beyersbergen.et.al.2004.waterb](https://www.fws.gov/mountain-prairie/refuges/hapetResources/updatedFiles/publications/Beyersbergen.et.al.2004.waterbird.plan.PPJV.pdf)  
538 [ird.plan.PPJV.pdf](https://www.fws.gov/mountain-prairie/refuges/hapetResources/updatedFiles/publications/Beyersbergen.et.al.2004.waterbird.plan.PPJV.pdf). Cited 9 April 2018.
- 539 35. NAWMP. North American Waterfowl Management Plan. 2012. Available from:  
540 [https://nawmp.org/nawmp-udpate/north-american-waterfowl-management-plan-2012-](https://nawmp.org/nawmp-udpate/north-american-waterfowl-management-plan-2012-revision)  
541 [revision](https://nawmp.org/nawmp-udpate/north-american-waterfowl-management-plan-2012-revision). Cited 9 April 2018.
- 542 36. Fritzell EK. Mammals in prairie wetlands. In: van der Valk AG, editor. Northern Prairie  
543 Wetlands. Ames: Iowa State University Press; 1989. pp. 268-301.
- 544 37. Larson DL, Euliss NH Jr, Lannoo MJ, Mushet DM. Amphibians of northern grasslands.  
545 In: Mac MJ, Opler PA, Puckett Haecker CE, Doran PD, editors. Status and trends of the

- 546 Nation's biological resources. Volume 2. Reston: U.S. Department of the Interior, US  
547 Geological Survey; 1998. pp. 450-451.
- 548 38. Swengel AB, Swengel SR. Tall-grass prairie butterflies and birds. In: Mac MJ, Opler PA,  
549 Puckett Haecker CE, Doran PD, editors. Status and trends of the Nation's biological  
550 resources, Volume 2. Reston: US Department of the Interior, US Geological Survey;  
551 1998.
- 552 39. Otto CRV, Roth CL, Carlson BL, Smart MD. Land-use change reduces habitat  
553 suitability for supporting managed honey bee colonies in the Northern Great Plains.  
554 PNAS. 2016;113: 10430-10435.
- 555 40. Stephens SE, Walker JA, Blunck DR, Jayaraman A, Naugle DE, Ringelman JK, Smith  
556 AJ. Predicting risk of habitat conversion in native temperate grasslands. *Conserv. Biol.*  
557 2008;22: 1320-1330.
- 558 41. United States Environmental Protection Agency (USEPA). Level III and IV ecoregions  
559 of the continental United States. 2013. Available from: [https://www.epa.gov/eco-](https://www.epa.gov/eco-research/level-iii-and-iv-ecoregions-continental-united-states)  
560 [research/level-iii-and-iv-ecoregions-continental-united-states](https://www.epa.gov/eco-research/level-iii-and-iv-ecoregions-continental-united-states). Cited 9 April 2018.
- 561 42. Leitch JA. Politicoeconomic overview of prairie potholes. In: Van der Valk AG, editor.  
562 Northern prairie wetlands. Ames: Iowa State University Press; 1989. pp. 2-15.
- 563 43. Higgins KF, Naugle DE, Forman JR. A case study of changing land use practices in the  
564 northern Great Plains, U.S.A.: an uncertain future for waterbird conservation. *Waterbirds.*  
565 2002;25 (Special Publication 2): 42-50.
- 566 44. Natural Capital Project. InVEST Version 3.2.0. Natural Capital Project; 2015. Available  
567 from: <http://www.naturalcapitalproject.org/invest>. Cited 9 April 2018.

- 568 45. Nelson E, Cameron DR, Regetz J, Polasky S, Daily GC. Terrestrial biodiversity. In:  
569 Kareiva P, Tallis H, Ricketts TH, Daily GC, Polasky S, editors. Natural capital: theory  
570 and practice of mapping ecosystem services. New York: Oxford University Press; 2011.
- 571 46. Haire SL, Bock CE, Cade BS, Bennett BC. The role of landscape and habitat  
572 characteristics in limiting abundance of grassland nesting songbirds in an urban open  
573 space. *Land. Urban Plan.* 2000;48: 65-82.
- 574 47. Grant TA, Madden E Berkey GB. Tree and shrub invasion in northern mixed-grass  
575 prairie: implications for breeding grassland birds. *Wildl. Soc. Bull.* 2004;32: 807-818.
- 576 48. Cunningham M, Johnson DH. Proximate and landscape factors influence grassland bird  
577 distributions. *Ecol. Applic.* 2006;16: 1062-1075.
- 578 49. Claassen R, Carriazo F, Cooper JC, Hellerstein D, Ueda K. Grassland to cropland  
579 conversion in the Northern Plains: the role of crop insurance, commodity, and disaster  
580 programs. Economic Research Report No. 120. Washington: US Department of  
581 Agriculture, Economic Research Service; 2011.
- 582 50. Sliwinski MS, Koper N. Grassland bird responses to three edge types in a fragmented  
583 mixed-grass prairie. *Avian Conserv. Ecol.* 2012;7: 6. [http://dx.doi.org/10.5751/ACE-](http://dx.doi.org/10.5751/ACE-00534-070206)  
584 [00534-070206](http://dx.doi.org/10.5751/ACE-00534-070206).
- 585 51. McLaughlin ME, Janousek WM, McCarty JP, Wolfenbarger LL. Effects of urbanization  
586 on site occupancy and density of grassland birds in tallgrass prairie fragments. *J. Field*  
587 *Ornithol.* 2014;85: 258-273.
- 588 52. Ludlow SM, Brigham RM, Davis SK. Oil and natural gas development has mixed effects  
589 on the density and reproductive success of grassland songbirds. *Condor Ornithol. Applic.*  
590 *2015;117: 64-75.*

- 591 53. Rodgers JA, Koper N. Shallow gas development and grassland birds: the importance of  
592 perches. *J. Wildl. Manage.* 2017;81: 406-416.
- 593 54. Tack JD, Quamen FR, Kelsey K, Naugle DE. Doing more with less: removing trees in a  
594 prairie system improves value of grasslands for obligate bird species. *Journal of*  
595 *Environ. Manage.* 2017;198: 163-169.
- 596 55. Forman RTT, Reineking B, Hersperger AM. Road traffic and nearby grassland bird  
597 patterns in a suburbanizing landscape. *Environ. Manage.* 2002;29: 782-800.
- 598 56. Kalyn Bogard HJ, Davis SK. Grassland songbirds exhibit variable responses to the  
599 proximity and density of natural gas wells. *J. Wildl. Manage.* 2014; 78:471-482.
- 600 57. R Core Team. R: a language and environment for statistical computing. Vienna: R  
601 Foundation for Statistical Computing; 2016. Available from: <http://www.R-project.org>.  
602 Cited 9 April 2018.
- 603 58. WE Energies. Developing and constructing wind energy; 2018. Available from: <http://>  
604 <http://www.we-energies.com/environmental/windenergy.pdf>. Cited 9 April 2018.
- 605 59. Hilbe JM. Negative binomial regression. 2nd edition. New York: Cambridge University  
606 Press; 2011.
- 607 60. Bystrak D. The North American Breeding Bird Survey. *Studies in Avian Biol.* 1981;6:  
608 34-41.
- 609 61. Niemuth ND, Estey ME, Fields SP, Wangler B, Bishop AA, Moore PJ, Grosse RC, Ryba  
610 AJ. Developing spatial models to guide conservation of grassland birds in the U.S.  
611 Northern Great Plains. *Condor.* 2017;119: 506-525.
- 612 62. White CA. A history of the rectangular survey system. Washington: U.S. Department of  
613 the Interior, Bureau of Land Management; 1983.

- 614 63. Hohman WL, Halloum DJ. A comprehensive review of farm bill contributions to wildlife  
615 conservation 1985–2000. Technical Report USDA/NRCS/WHMI-2000: US Department  
616 of Agriculture; 2000.
- 617 64. Haufler JB. Fish and wildlife benefits of farm bill conservation programs: 2000–2005  
618 update. Tech Rev 05-2: The Wildlife Society; 2005. Available from:  
619 [https://www.nrcs.usda.gov/Internet/FSE\\_DOCUMENTS/16/nrcs143\\_013260.pdf](https://www.nrcs.usda.gov/Internet/FSE_DOCUMENTS/16/nrcs143_013260.pdf). Cited  
620 9 April 2018.
- 621 65. Veech JA. A comparison of landscape occupied by increasing and decreasing populations  
622 of grassland birds. *Conserv. Biol.* 2006;20: 1422-1432.
- 623 66. United States Fish and Wildlife Service (USFWS). Birds of conservation concern.  
624 Arlington: United States Department of Interior, Fish and Wildlife Service, Division of  
625 Migratory Bird Management; 2008. Available from:  
626 <https://www.fws.gov/migratorybirds/pdf/grants/BirdsofConservationConcern2008>. Cited  
627 9 April 2018.

628

629

## 630 **Supporting information**

631 **S1 Table.** Area (ha) of land within Minnesota (MN), North Dakota (ND), South Dakota (SD),  
632 and Iowa (IA) enrolled in the U.S. Department of Agriculture’s Conservation Reserve  
633 Program, 2007 to 2014 (USDA 2016).

634 **S2 Table.** Sources of information for all spatial layers used to model grassland-bird habitat in the  
635 Prairie Pothole Region of the United States.  
636  
637

638 **S3 Table. InVEST Habitat and Sensitivity Table.** Rankings of National Agricultural Statistics  
639 Service land-cover habitat categories by suitability as breeding habitat for grassland-bird species  
640 (Habitat column) and ranking of sensitivity of those habitat categories to each of five threats to  
641 grassland-bird species in the Prairie Pothole Region of the United States.

642 **S4 Table. InVEST Threat table.** Land-use categories treated as threats to the integrity of  
643 grassland-bird habitat in the Prairie Pothole Region of the United States are organized by their  
644 relative threat value, or weight. Distance reflects how far an influence a pixel of a threat exerts  
645 on surrounding pixels.

**S5 Fig.** Distribution of unsuitable habitat due to the impact of oil development in the Bakken  
Region of northwestern North Dakota, United States of America, showing the negative impact  
on habitat suitability of oil wells, the black squares.

646

647

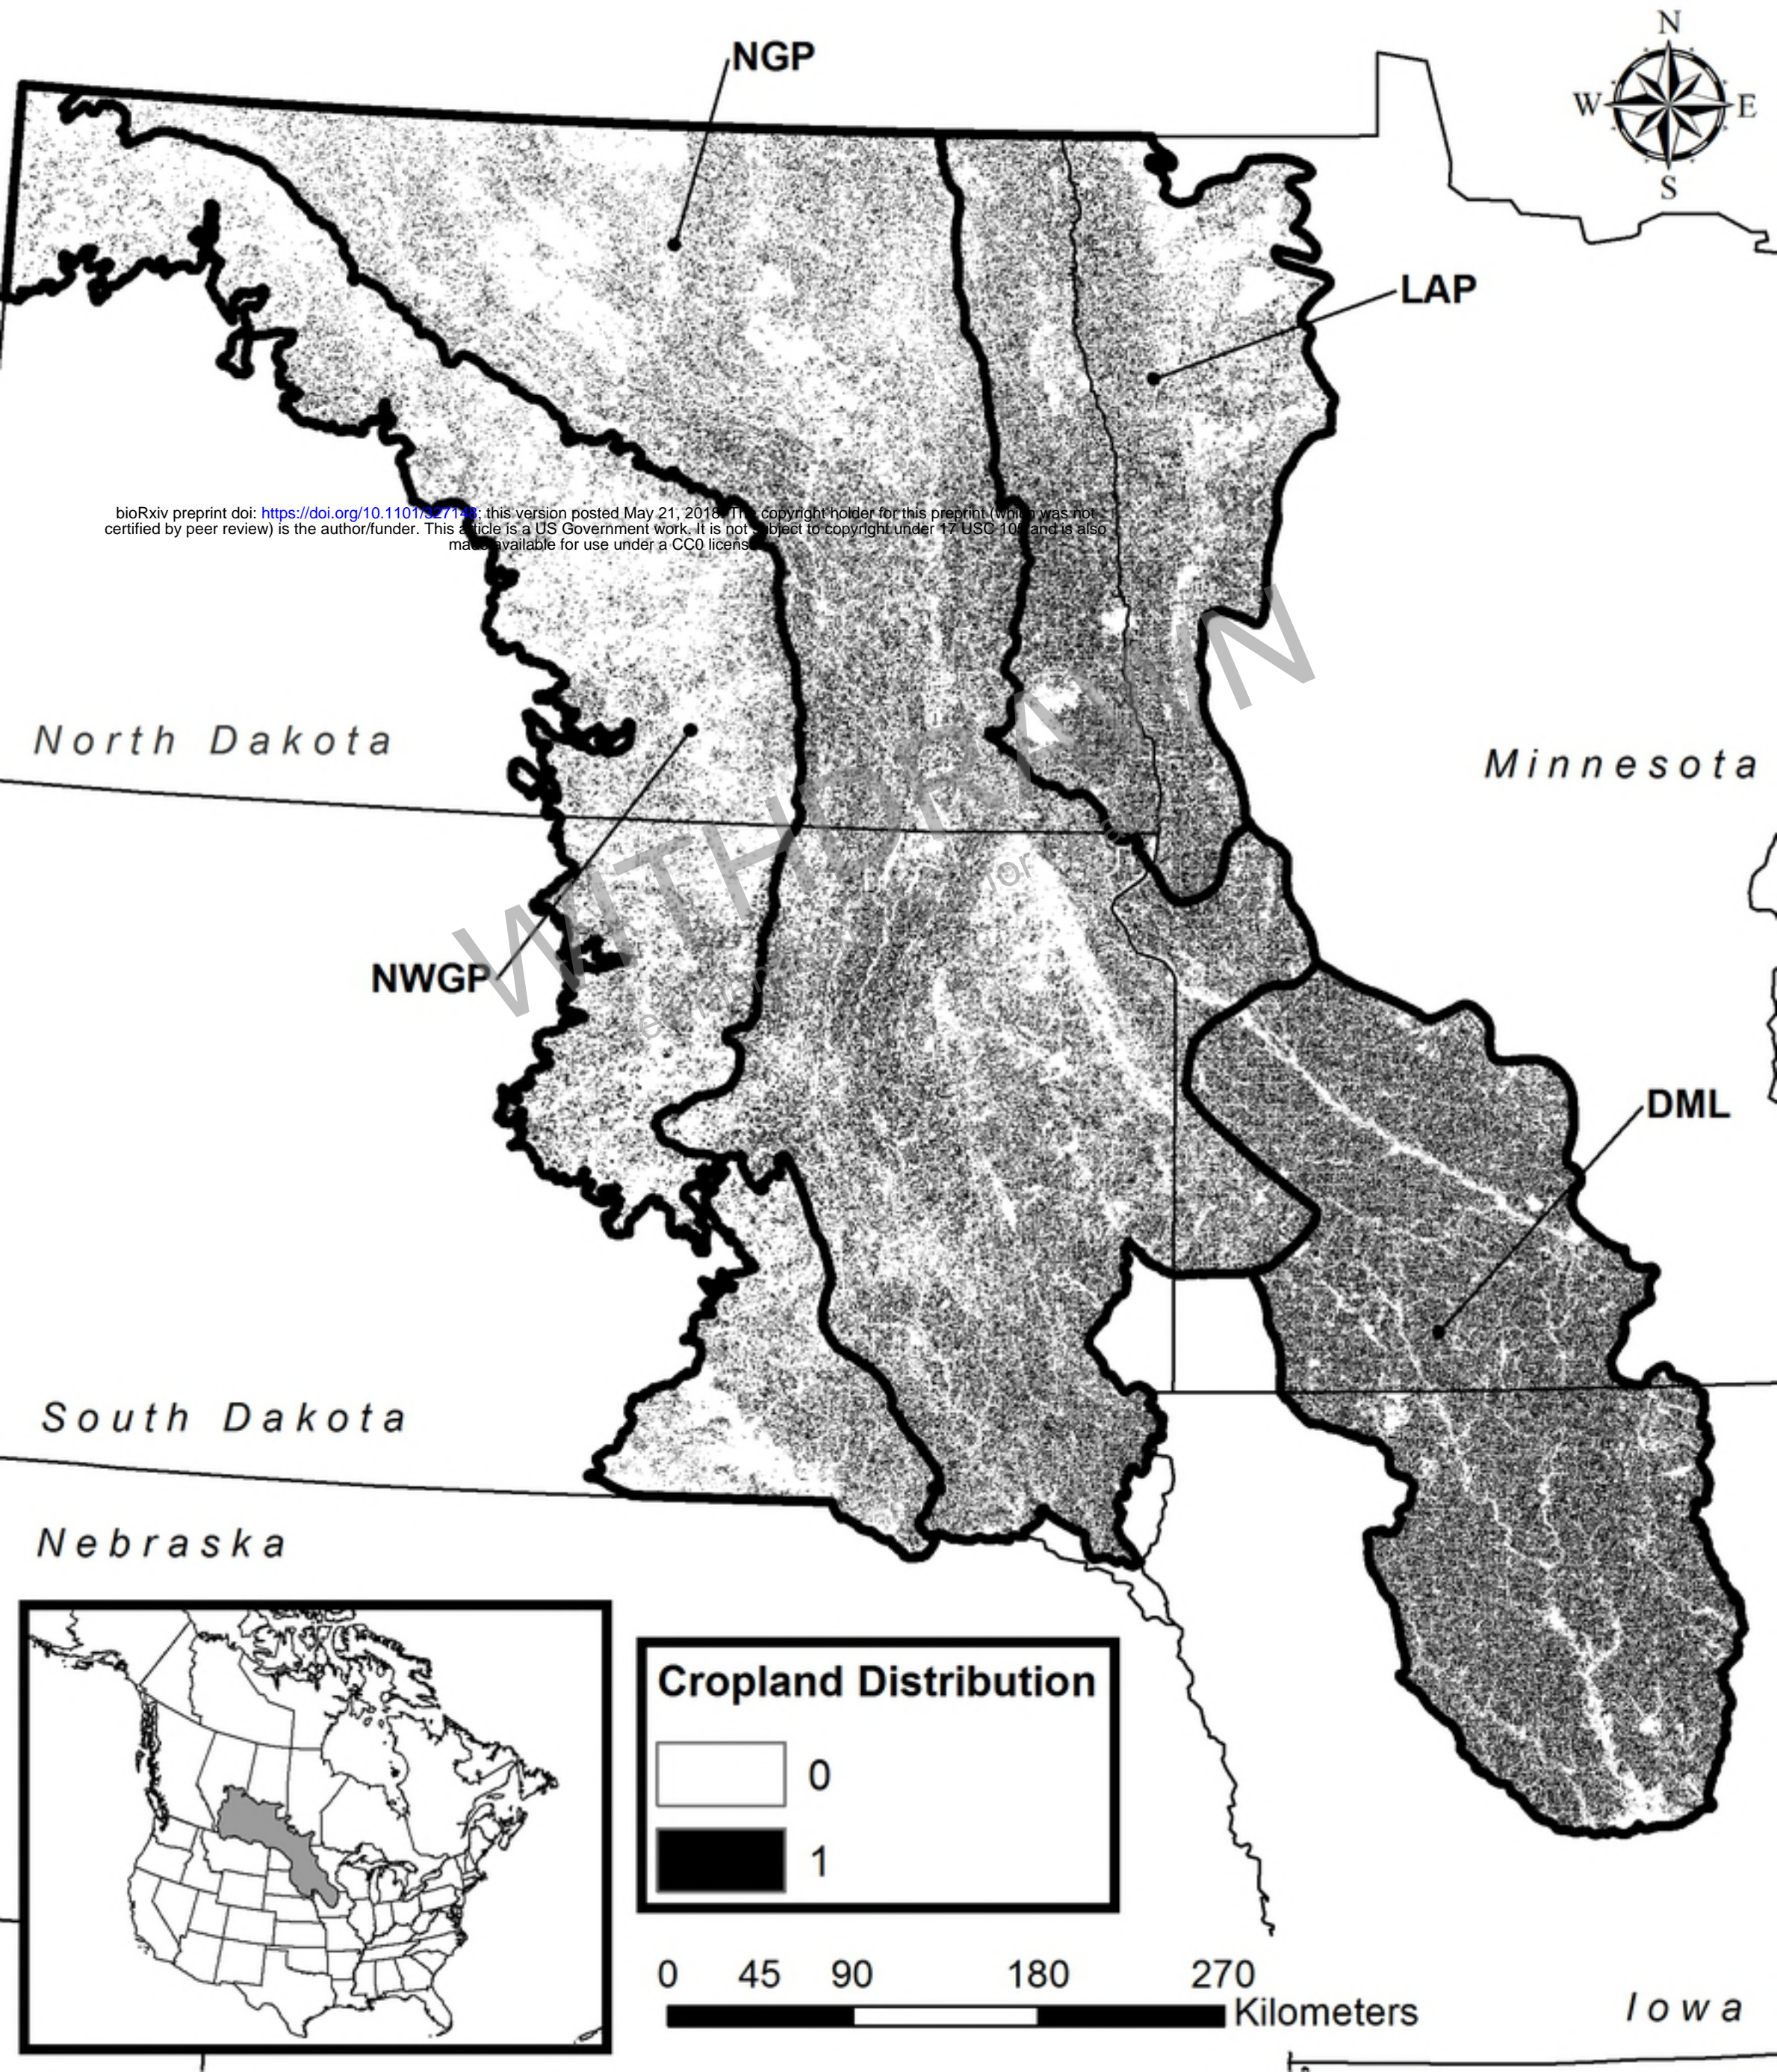



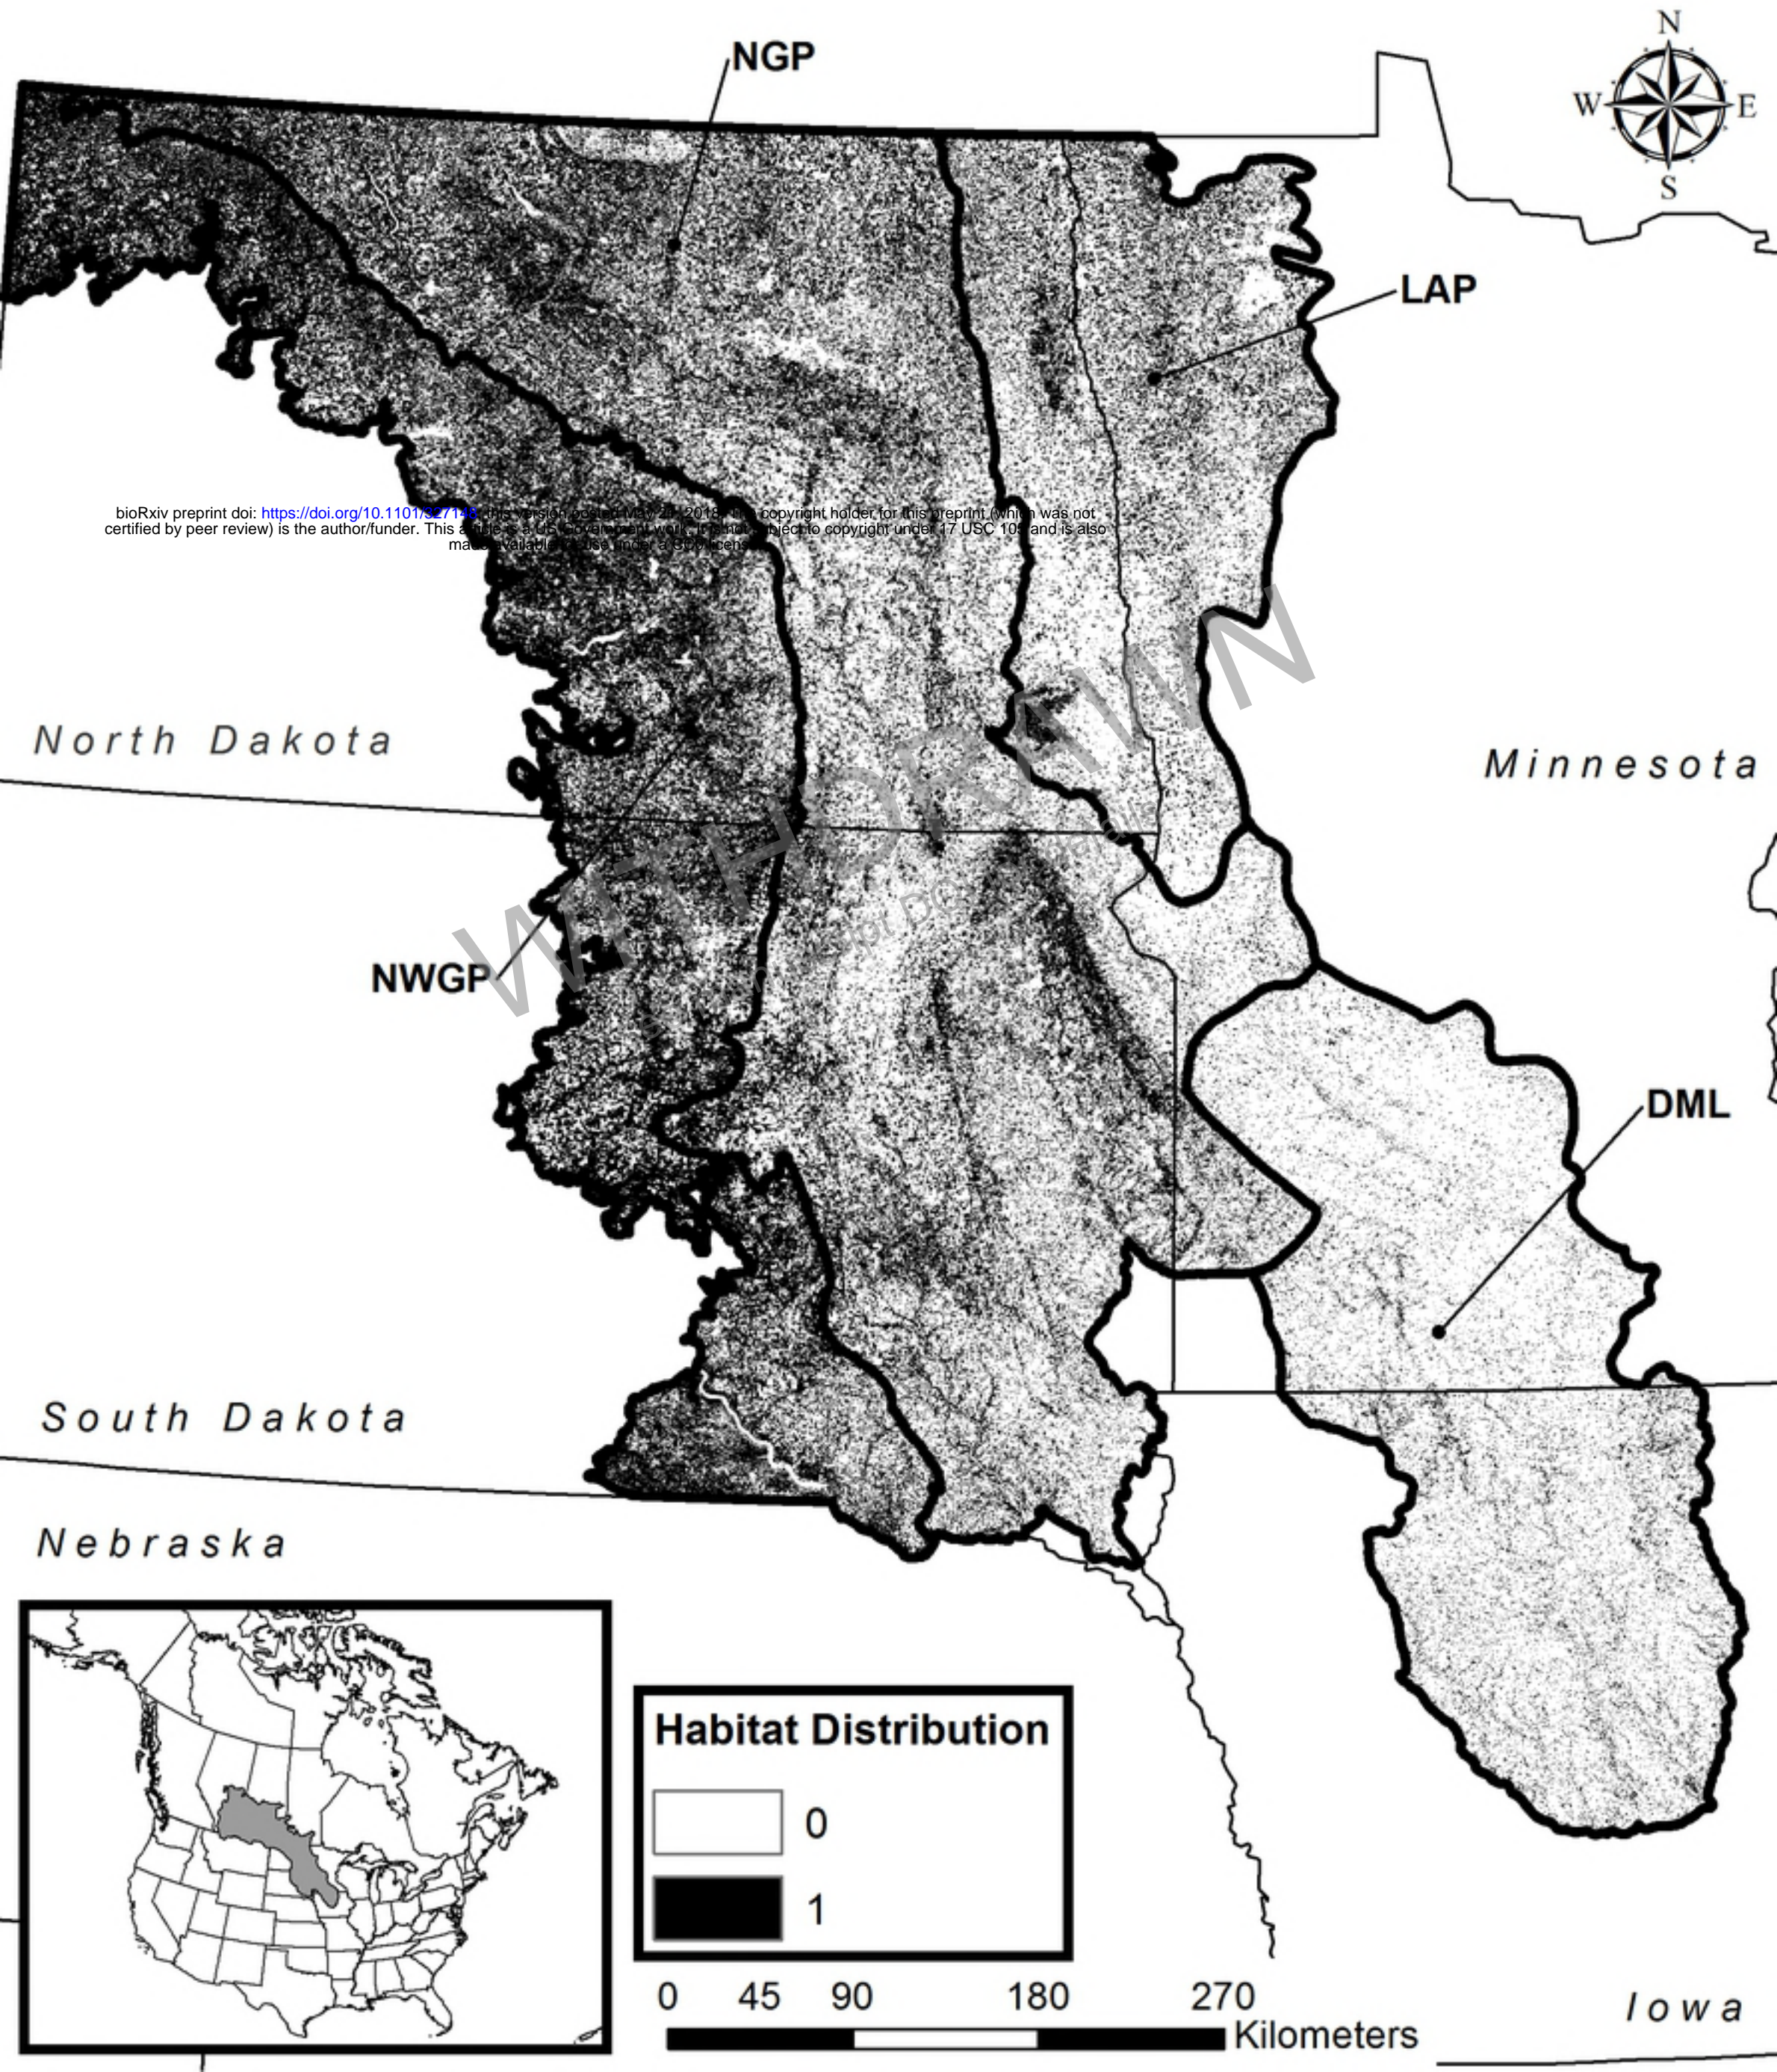

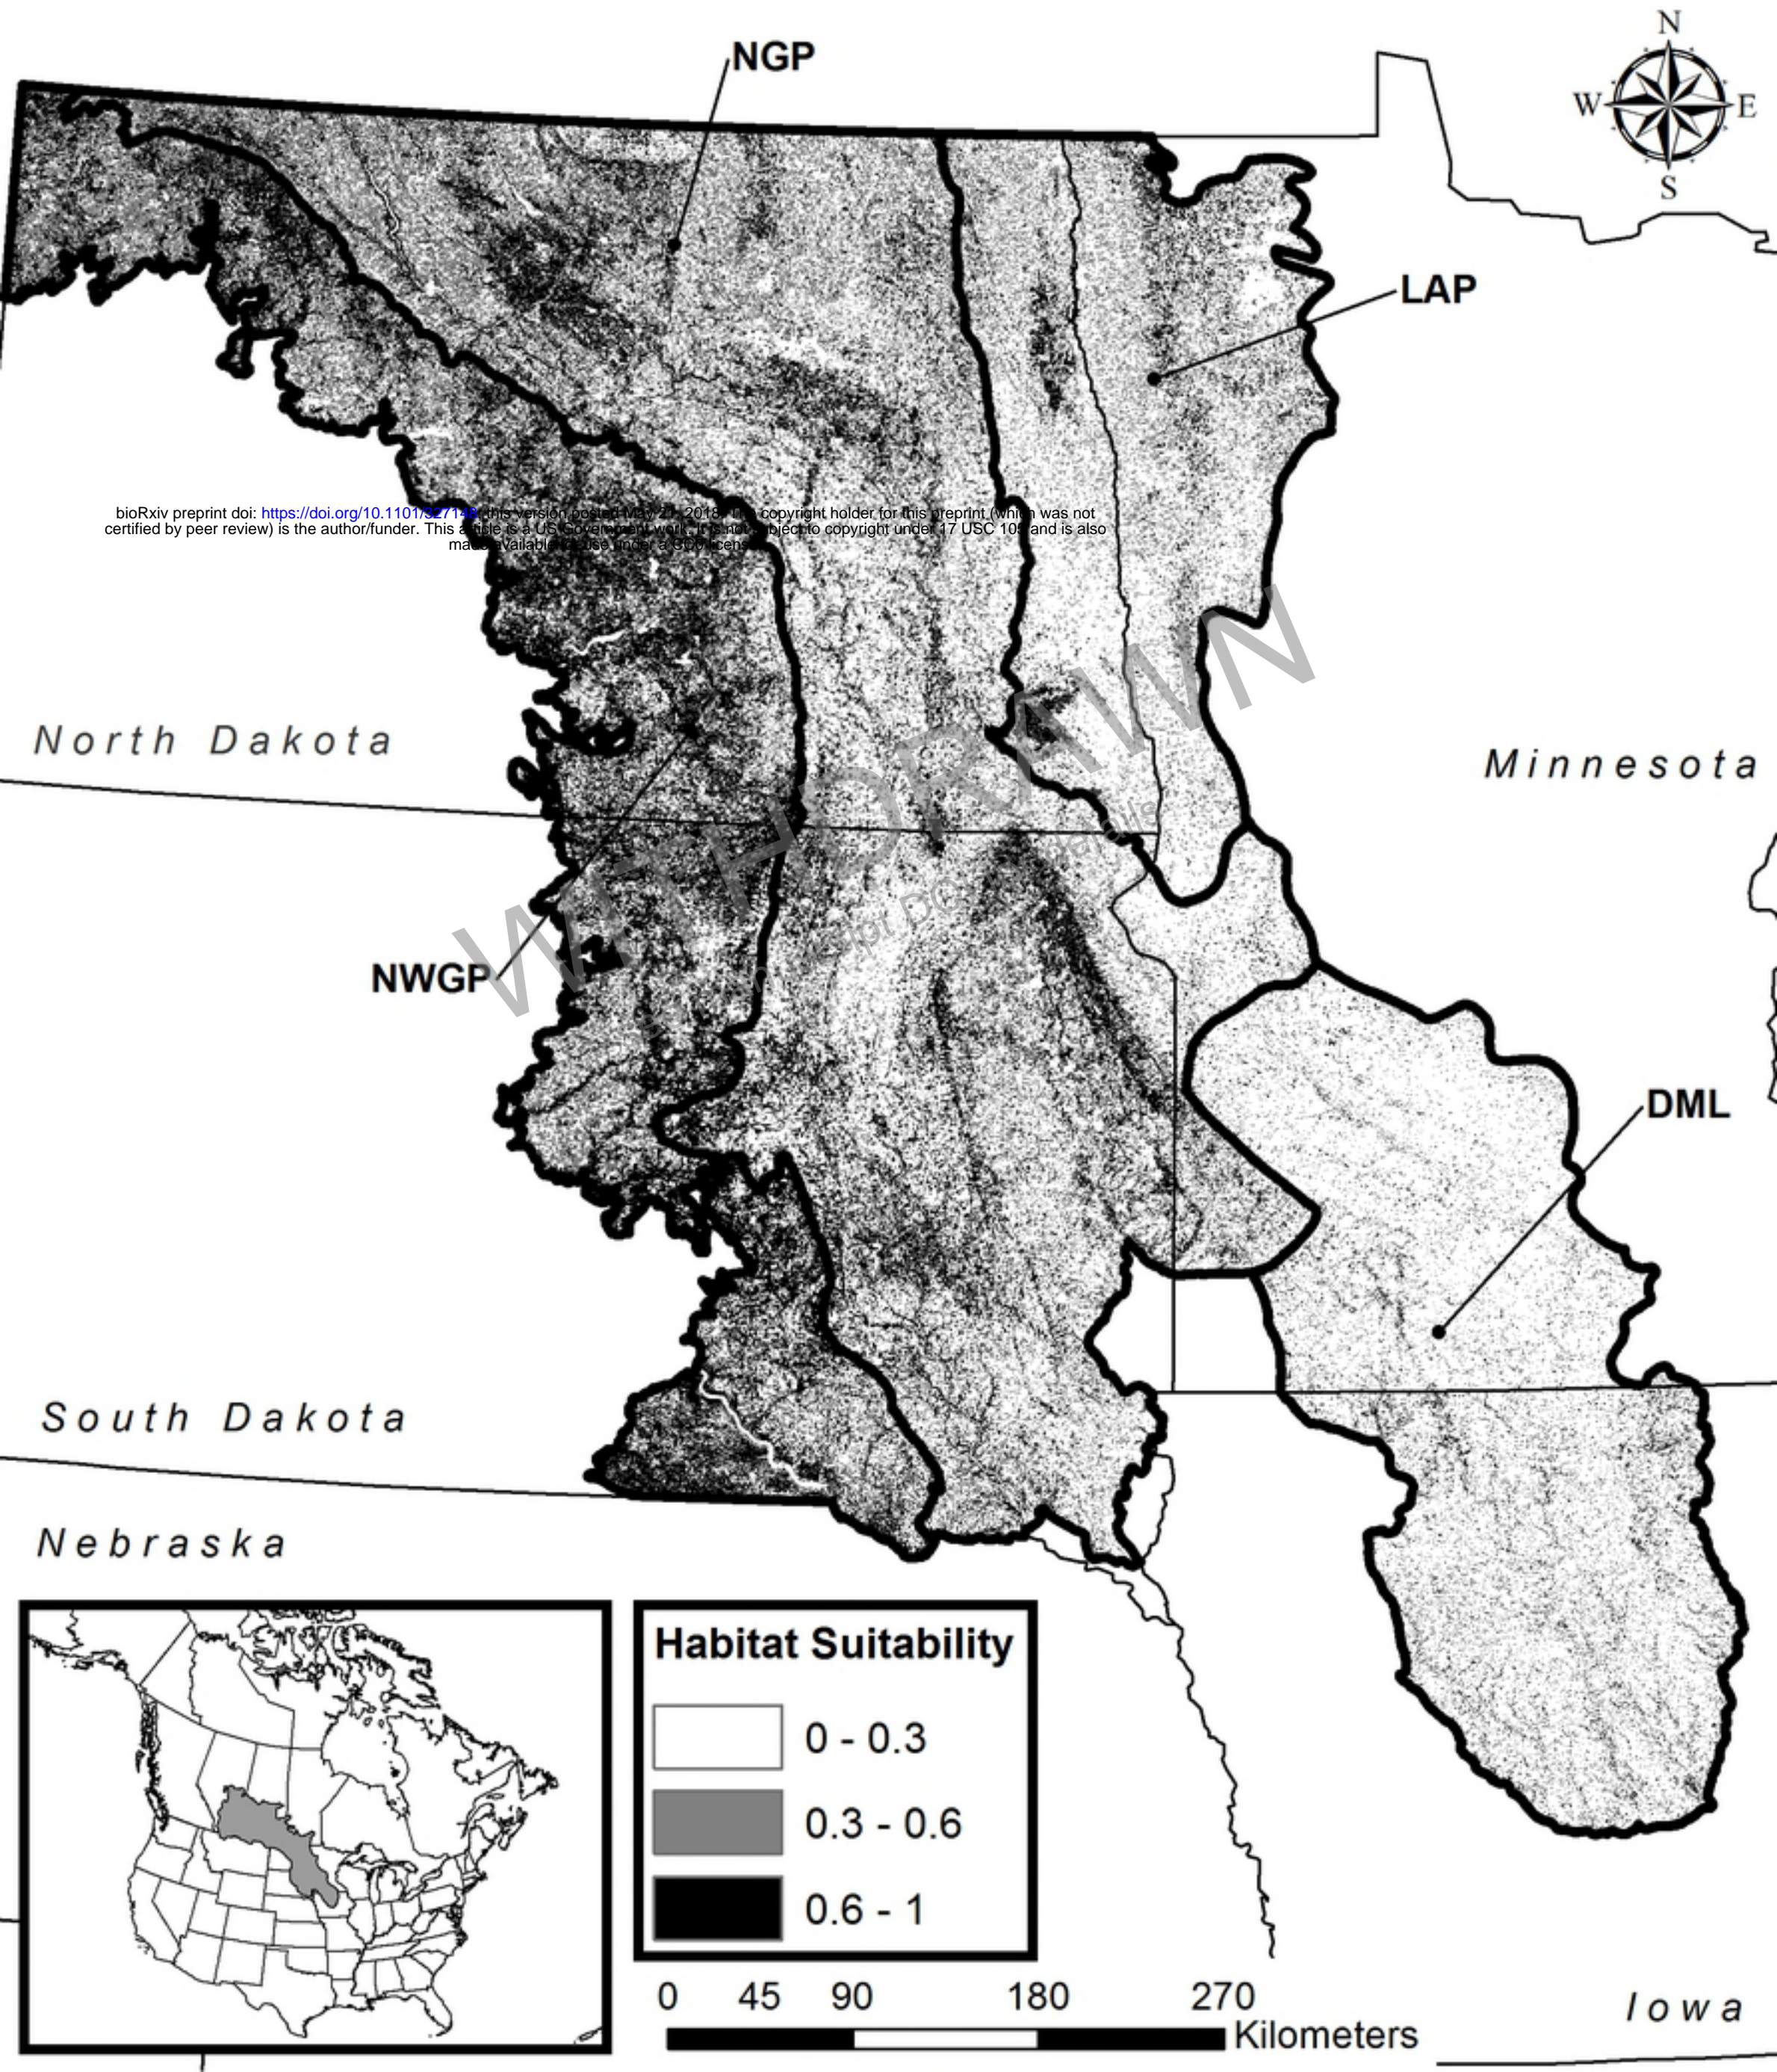

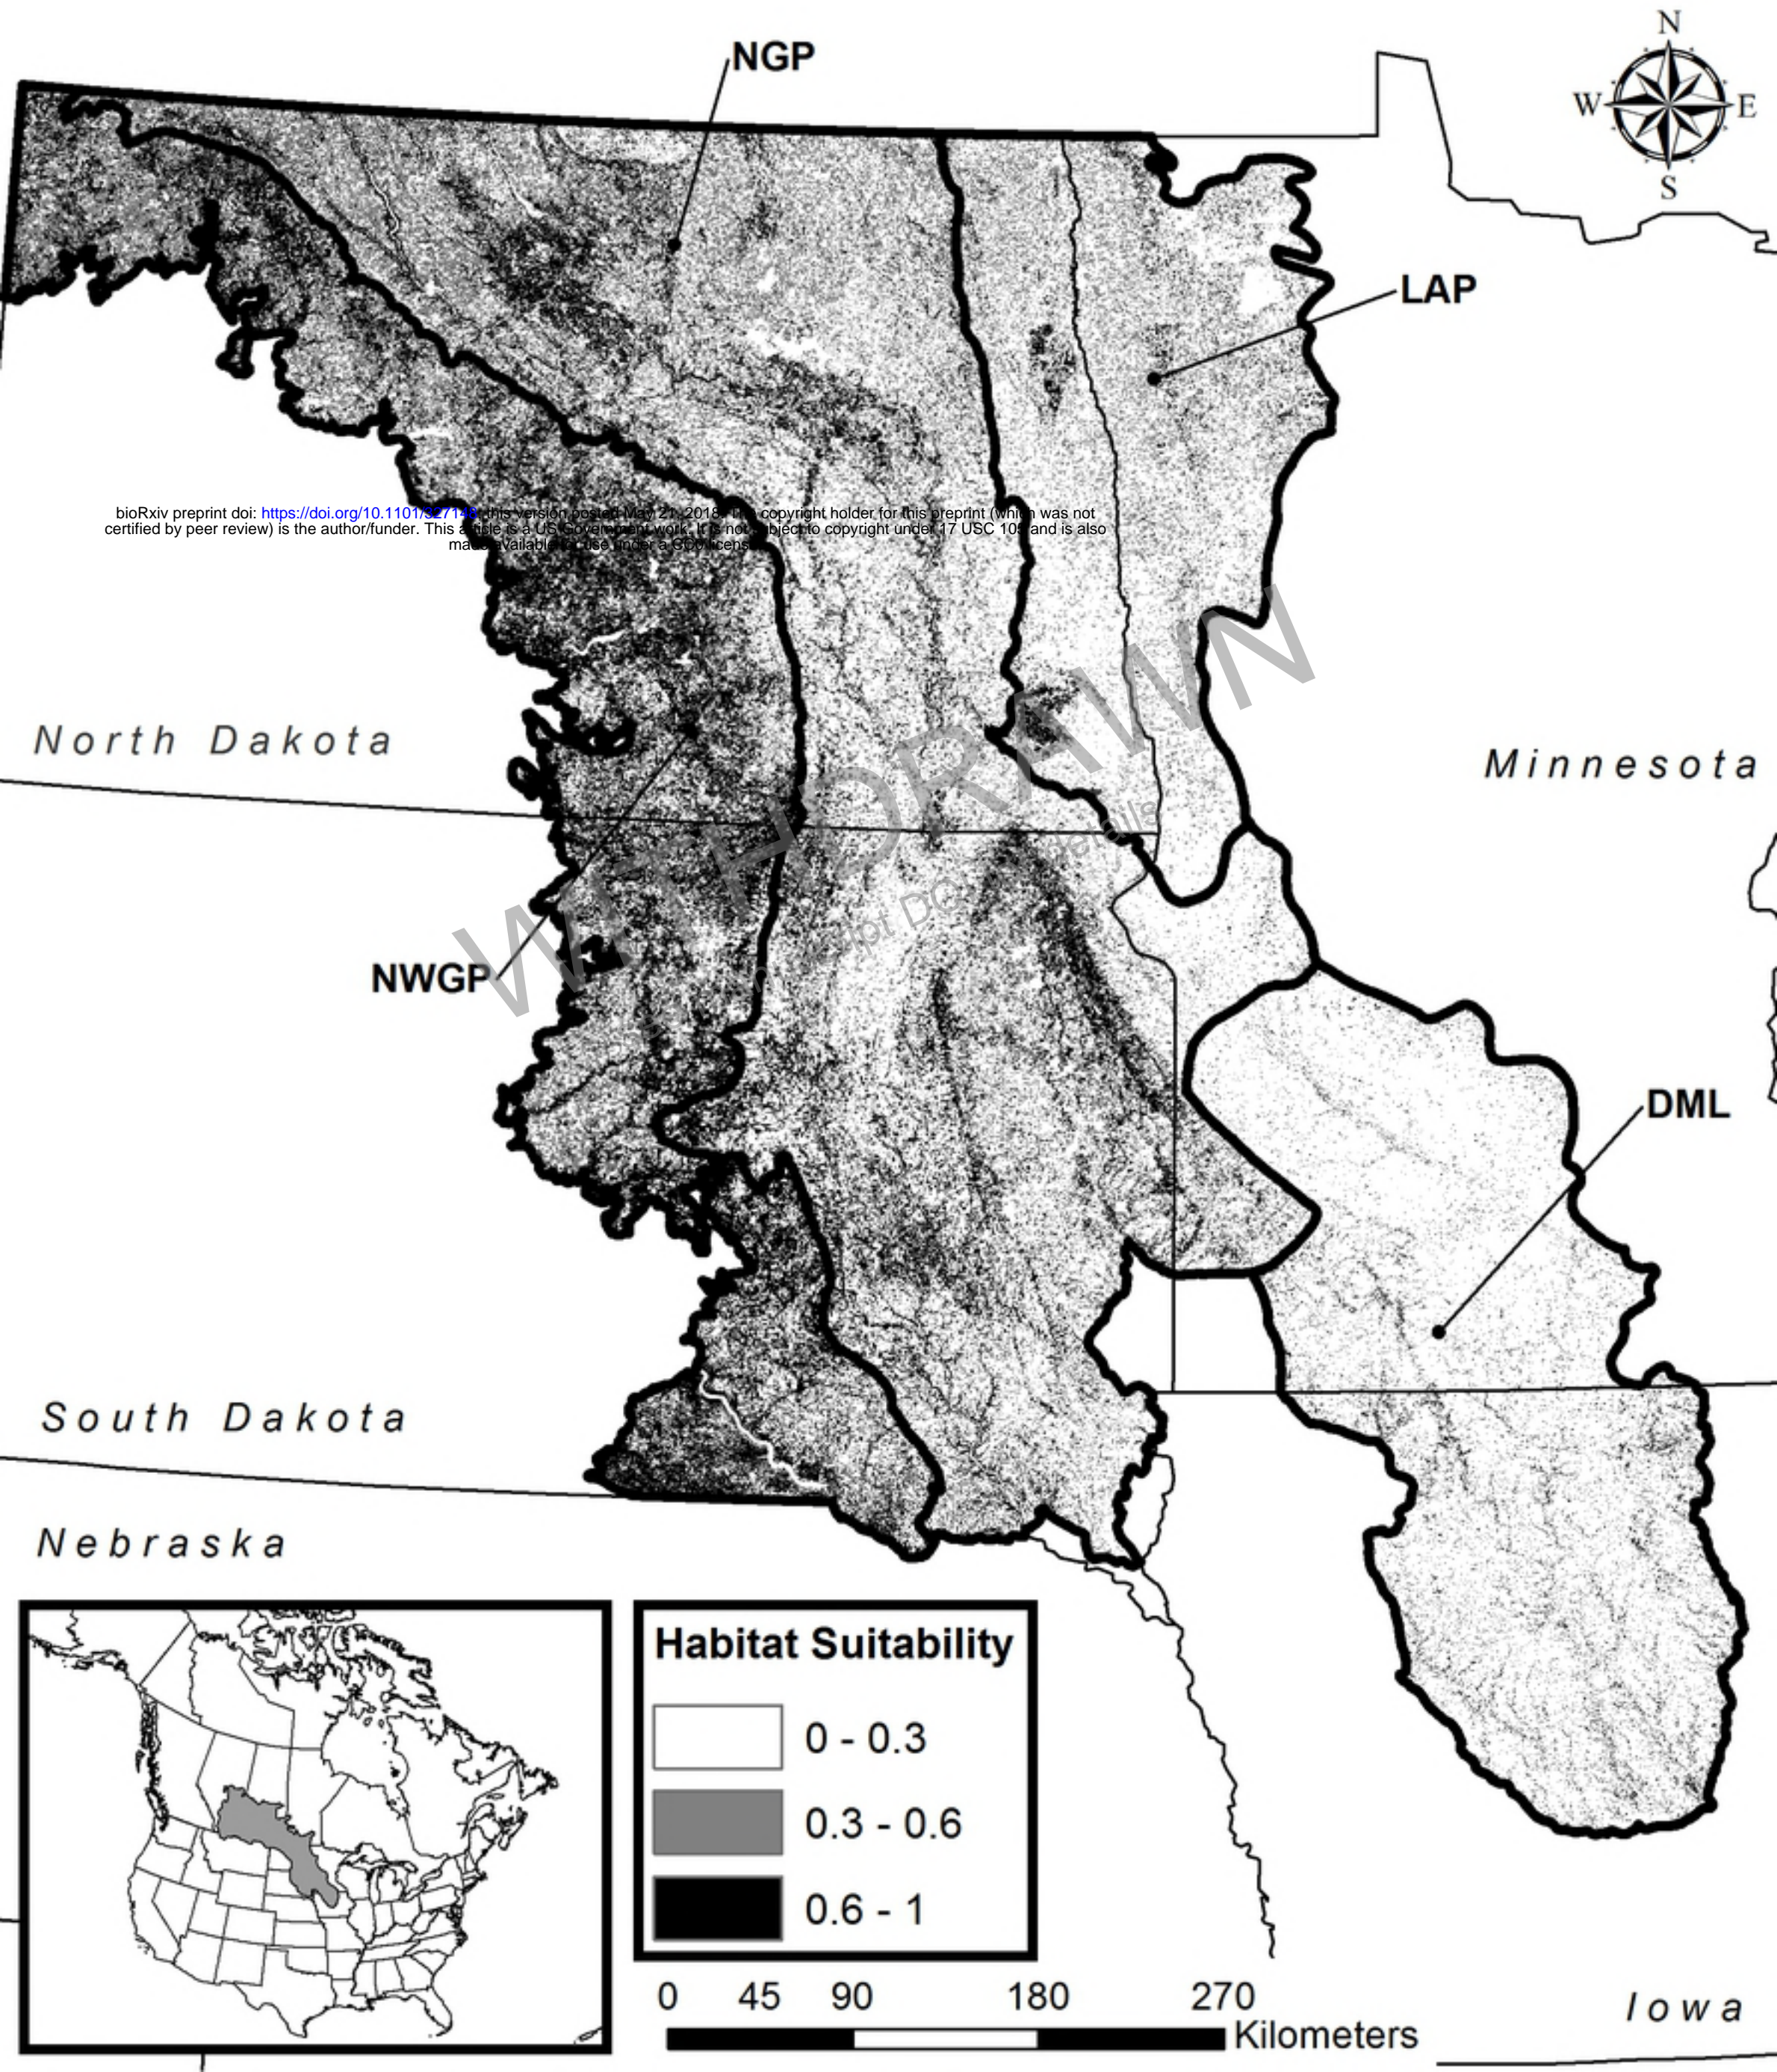

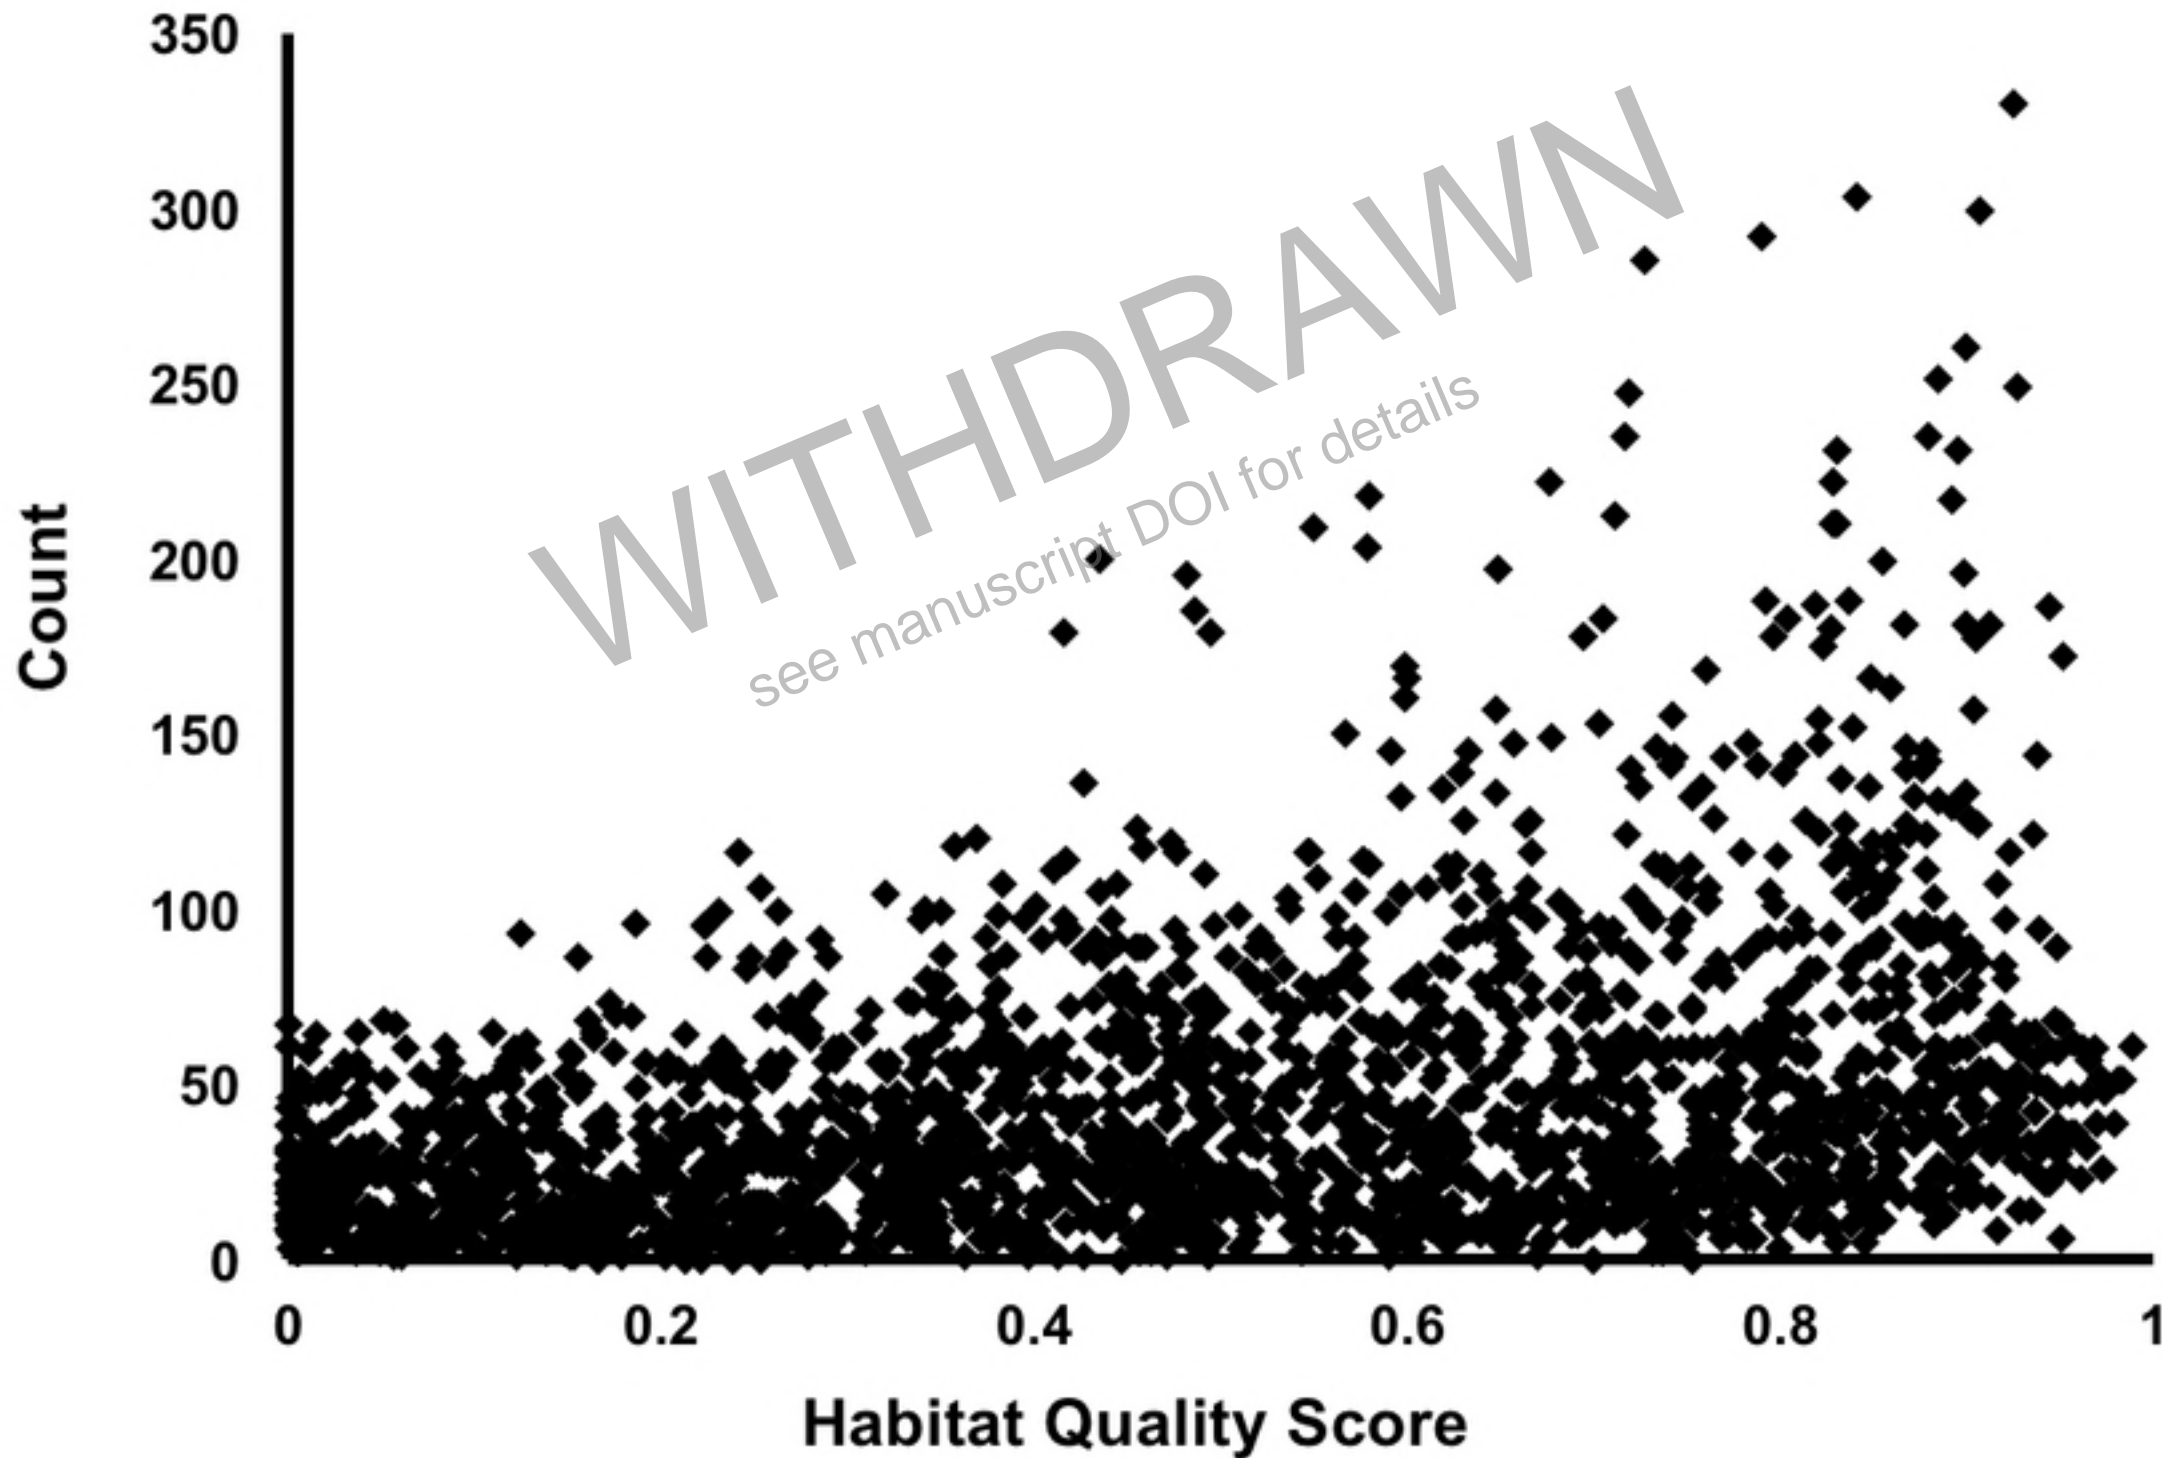

Source: http://biorxiv.org/content/10.1101/327148v1.full.pdf
